# Supplementary material for: A Combined Experimental and Computational Study of Halogen and Hydrogen Bonding in Molecular Salts of 5-Bromocytosine
Source: MDPI journal article supplement (doi:10.3390/molecules26113111), 2021-05-23
Supplement: s1 [file s1]

Supporting Information

# A Combined Experimental and Computational Study of Halogen and Hydrogen Bonding in Molecular Salts of 5-Bromocytosine

Massimiliano Aschi <sup>1</sup>, Giorgia Toto Brocchi <sup>2</sup> and Gustavo Portalone <sup>2,\*</sup>

<sup>1</sup> Dipartimento di Scienze Fisiche e Chimiche Università degli Studi di L'Aquila, Via Vetoio, 67100 Coppito, AQ, Italy

<sup>2</sup> Dipartimento di Chimica, Sapienza Università di Roma, P.le A. Moro 5, 00185 Roma, Italy

\* Correspondence: gustavo.portalone@uniroma1.it (G.P.)

## INDEX:

Figures S1–S6: Decomposed two-dimensional fingerprint plots for compounds (I)–(VI).

Tables S1–S14: Geometrical details, and related bond-CP index for the short-contact pair-interactions emerged from structural analysis.

Table S15: Cartesian coordinates of all the clusters utilized in the work and Cartesian coordinates of the corresponding bond-CP.

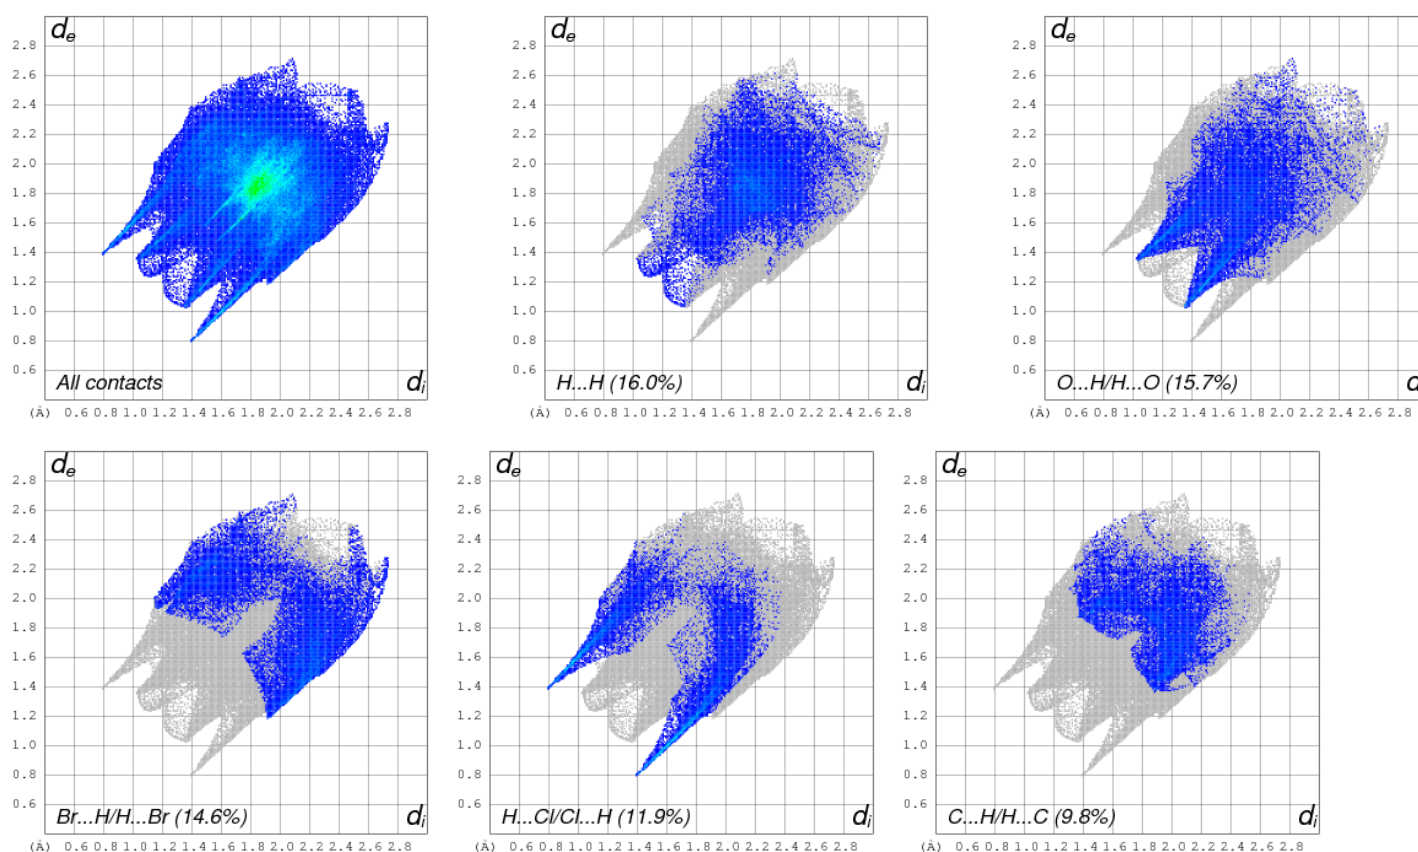

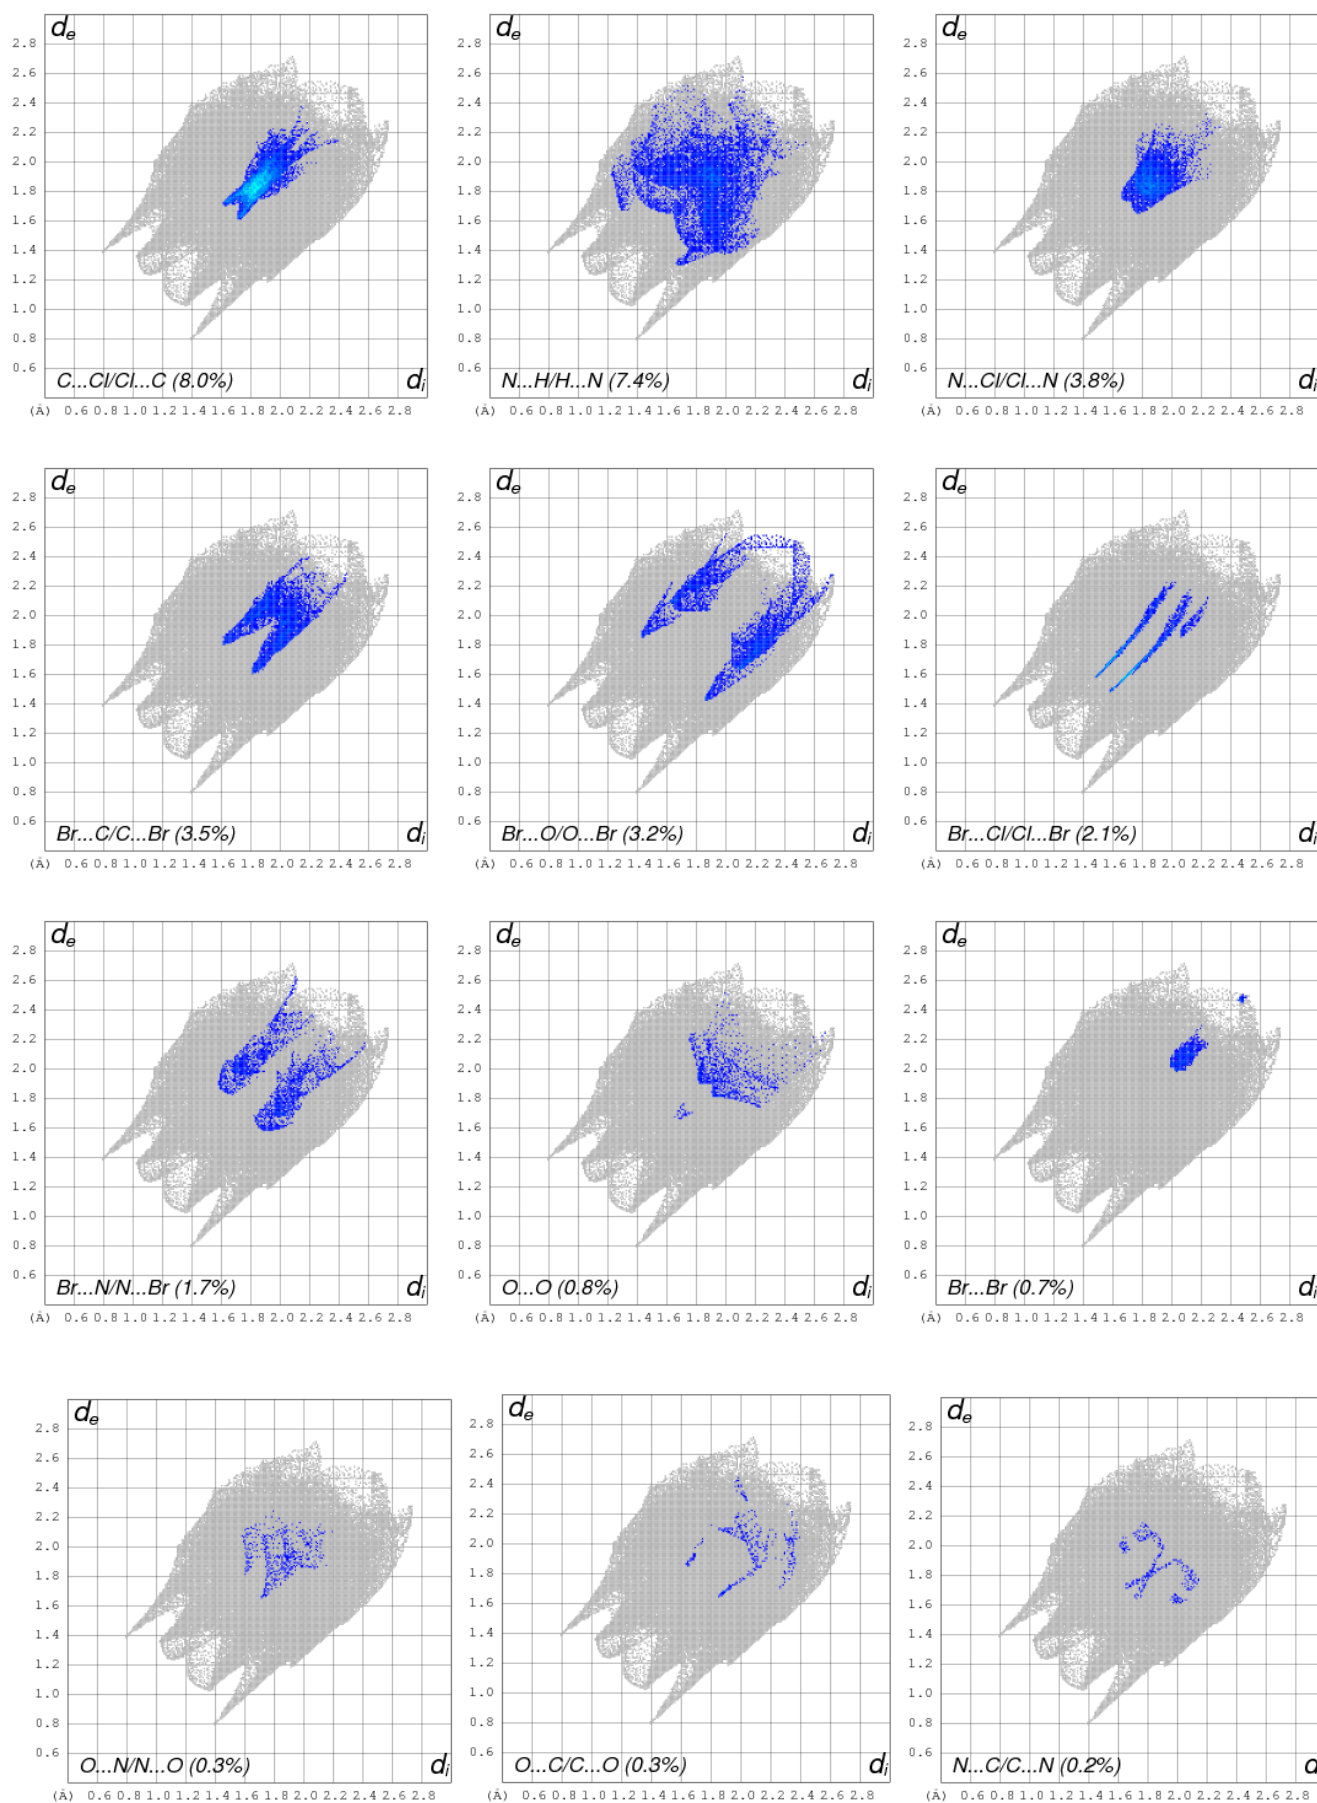

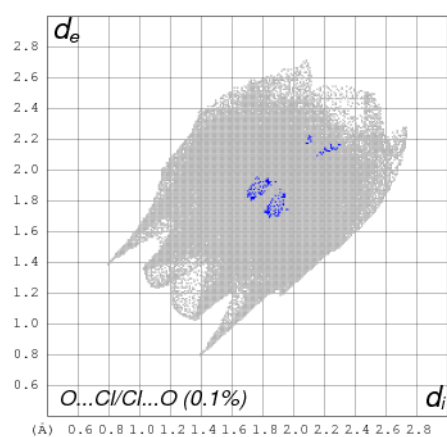

**Figures S1:** decomposed two-dimensional fingerprint plots for compound (I).

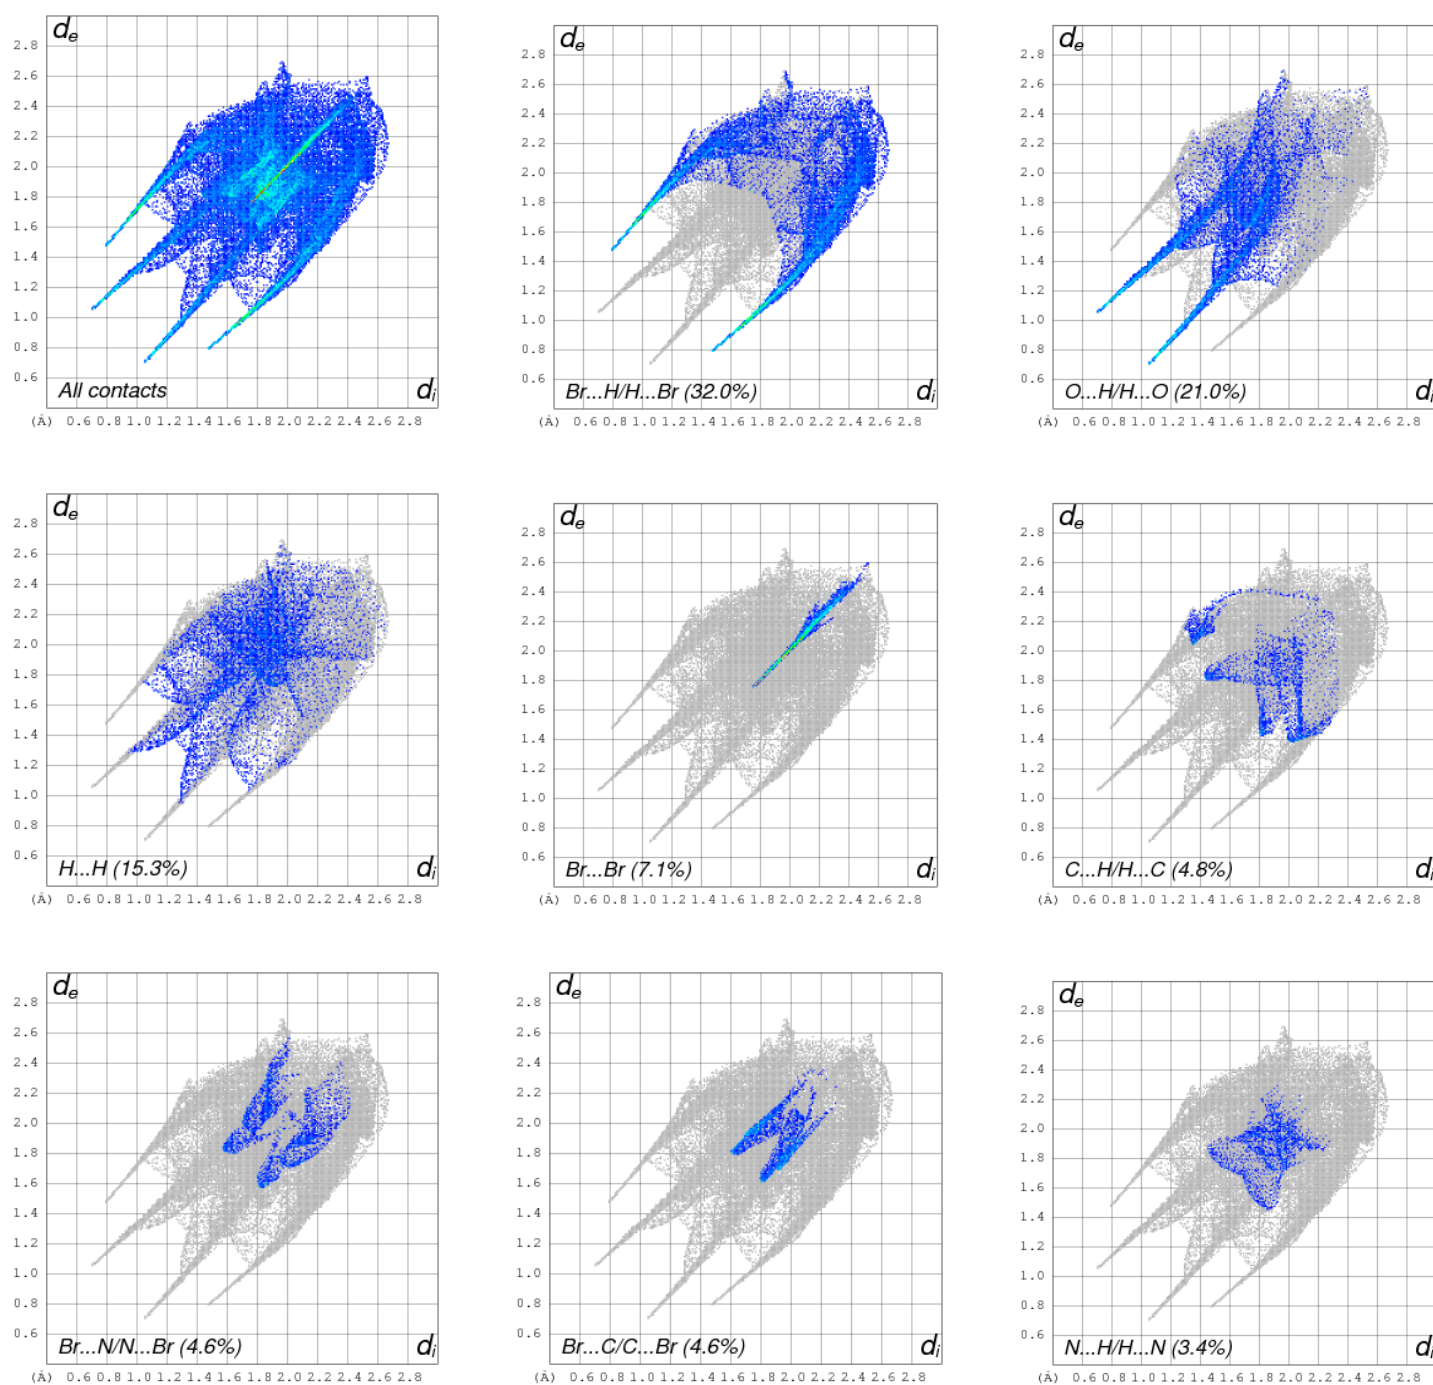

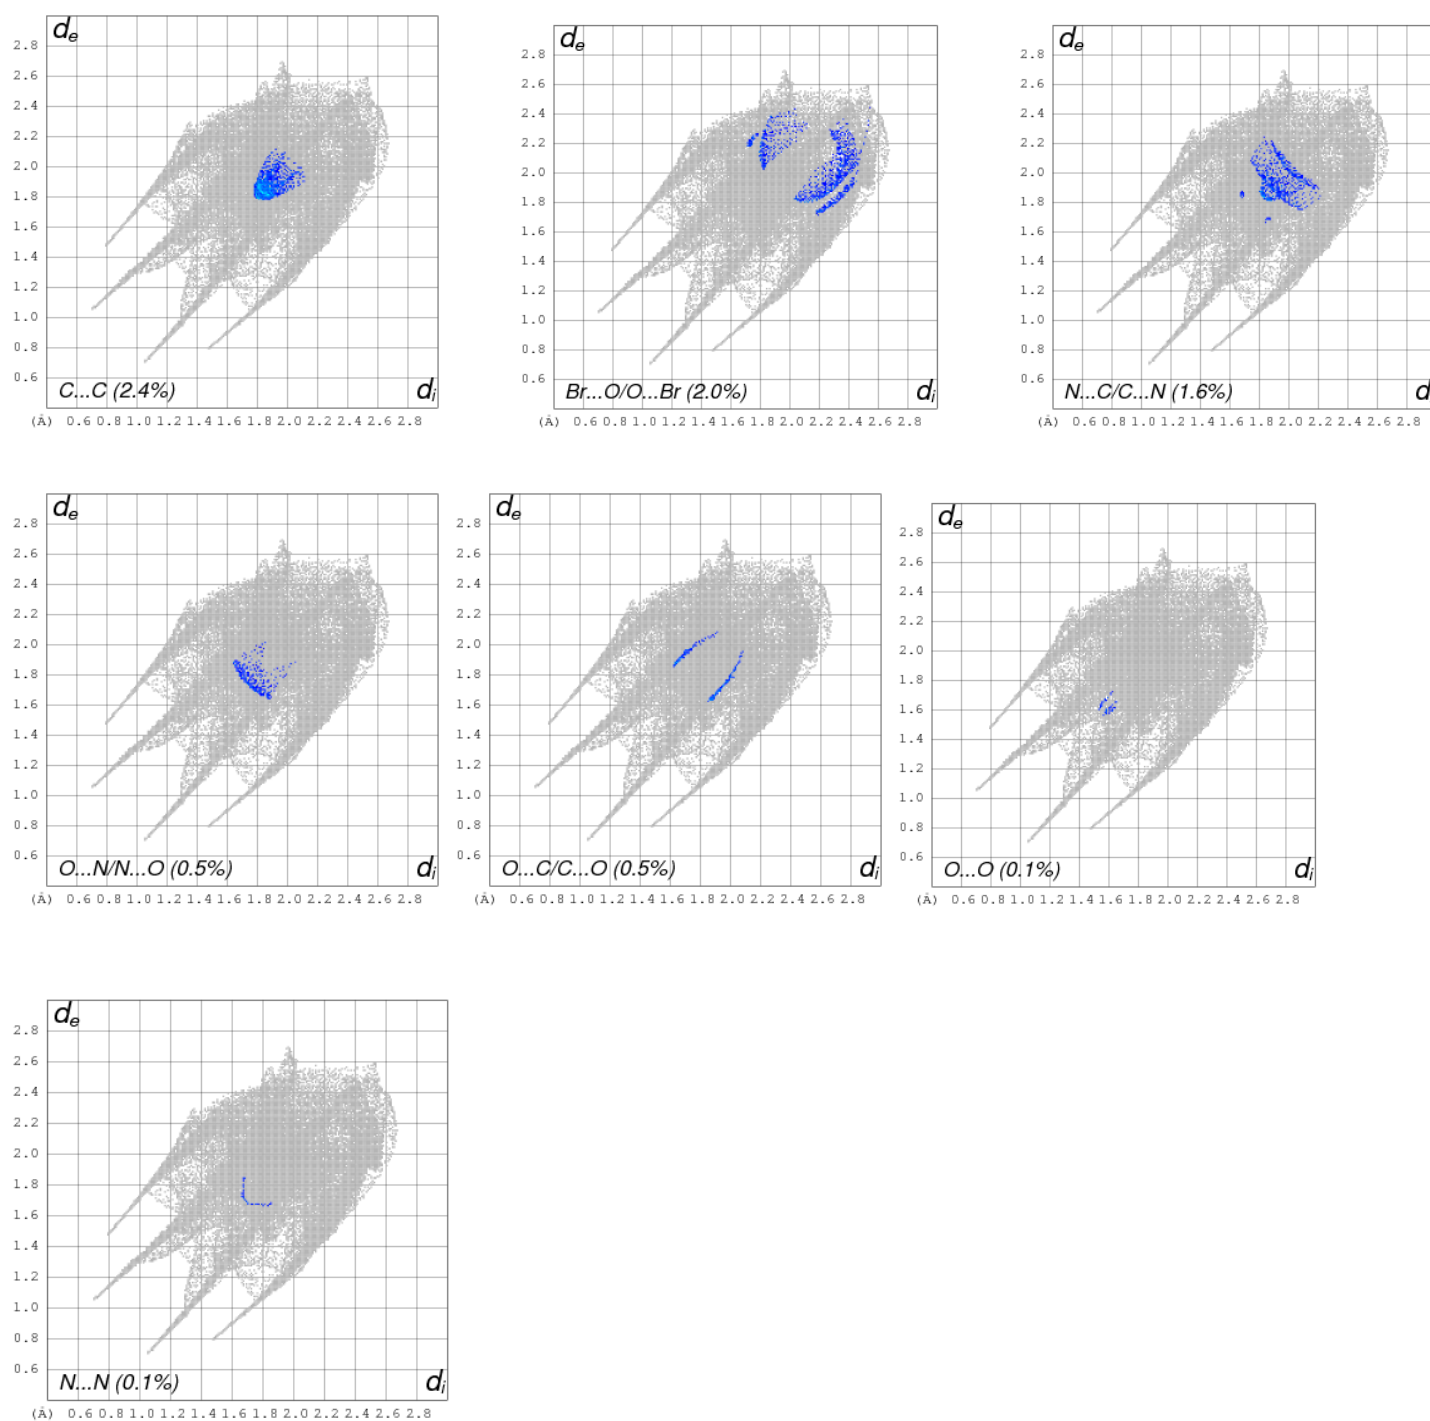

Figures S2: decomposed two-dimensional fingerprint plots for compound (II).



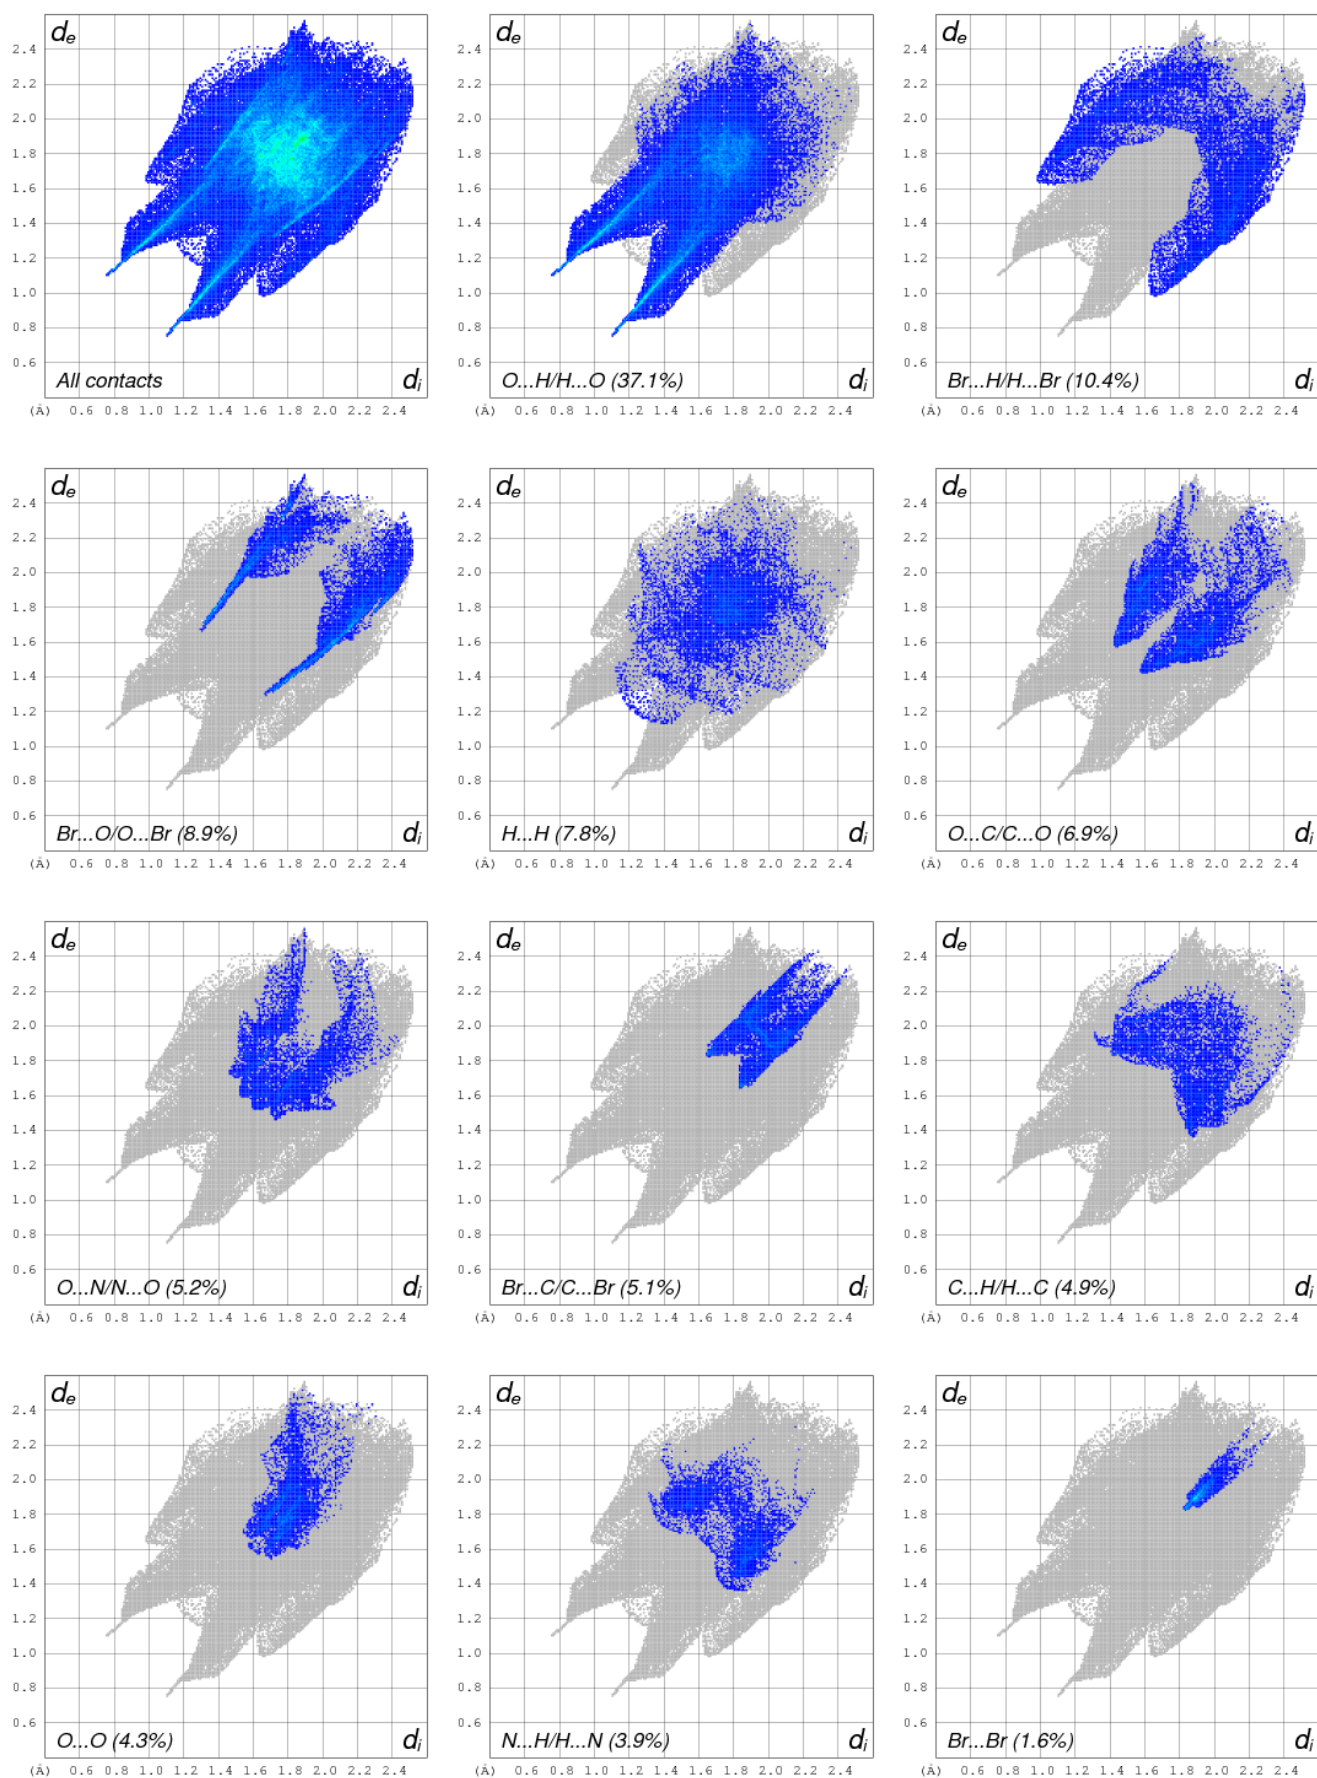

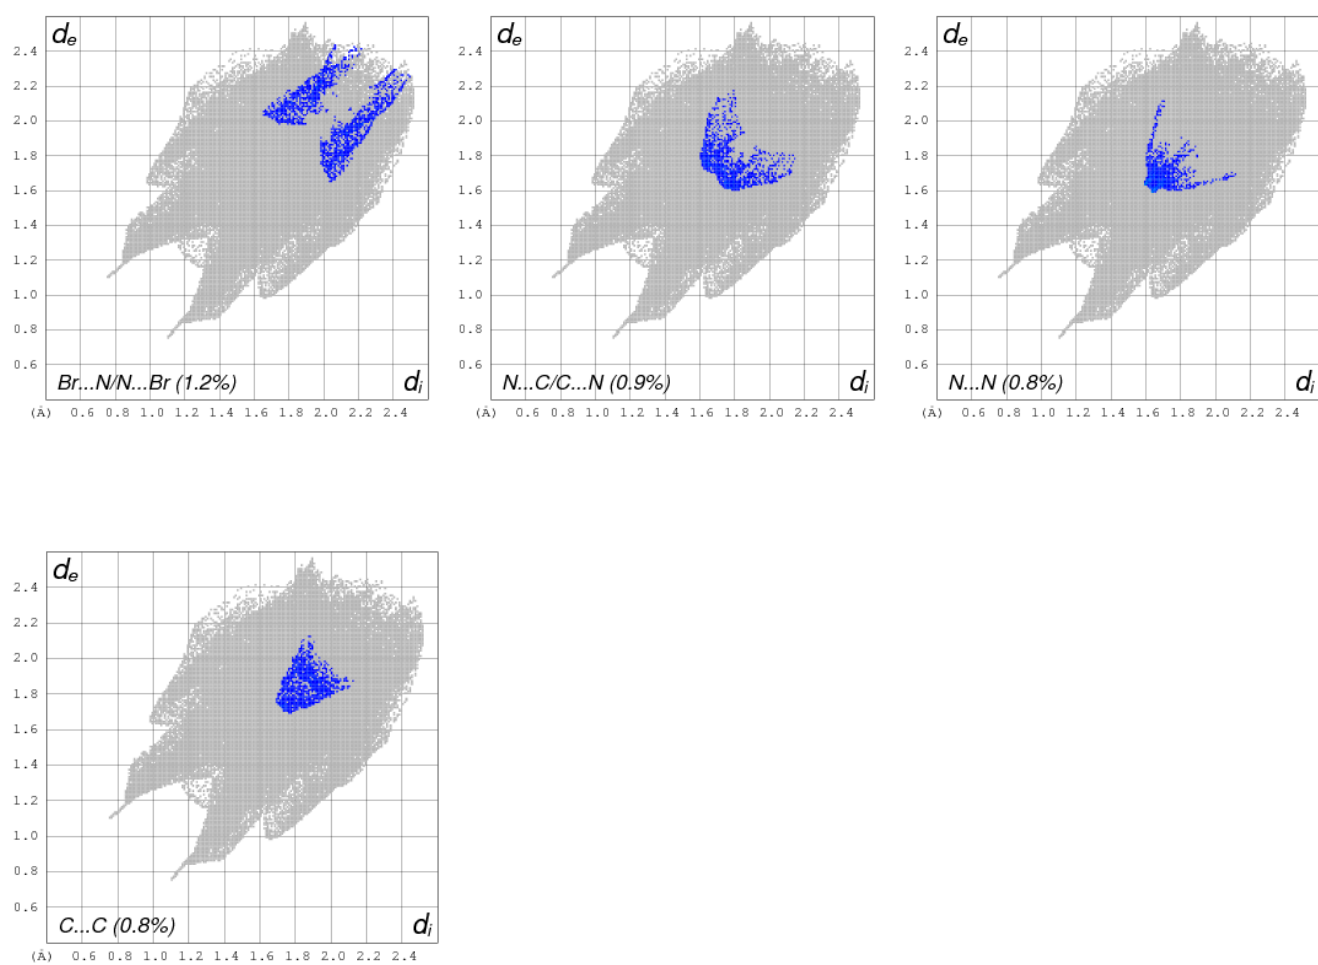

**Figures S3:** decomposed two-dimensional fingerprint plots for compound (III).

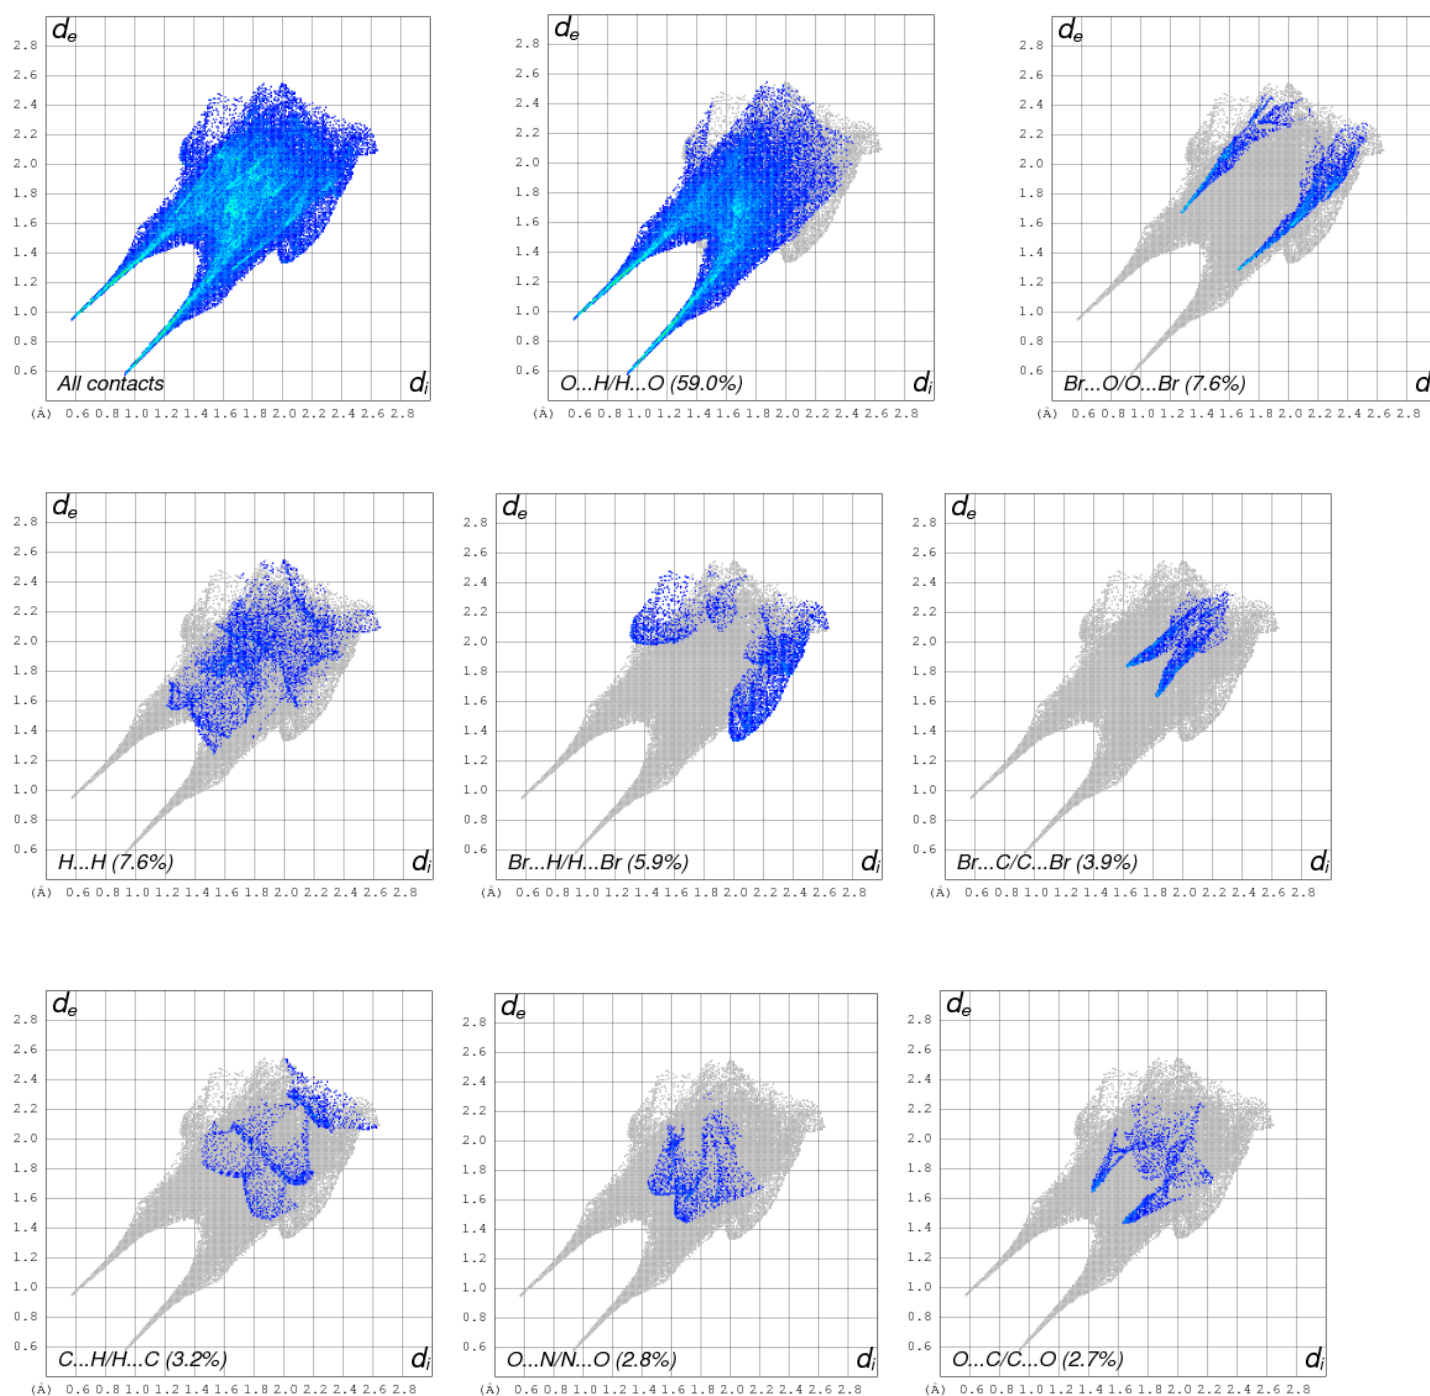



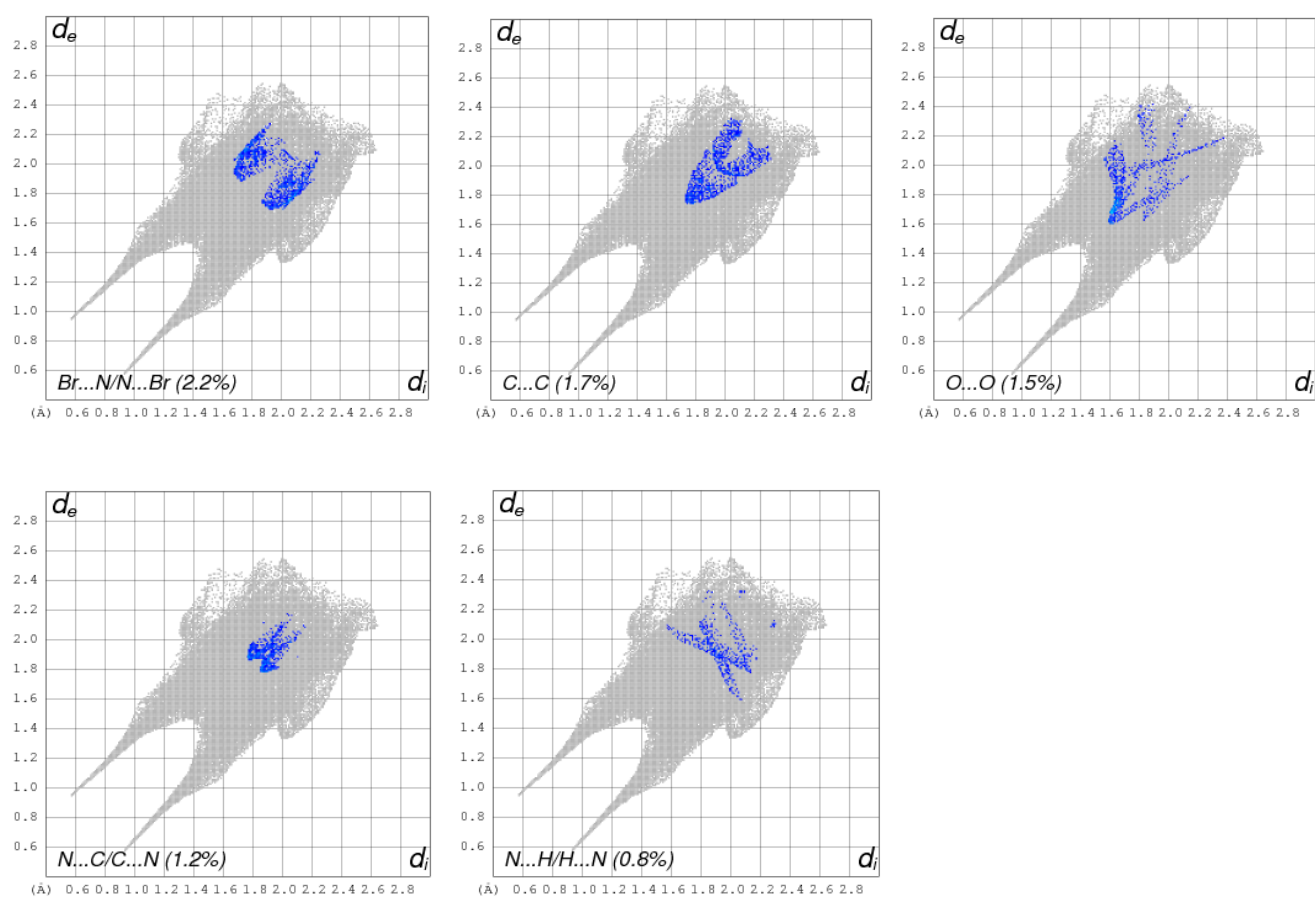

**Figures S4:** decomposed two-dimensional fingerprint plots for compound (IV).

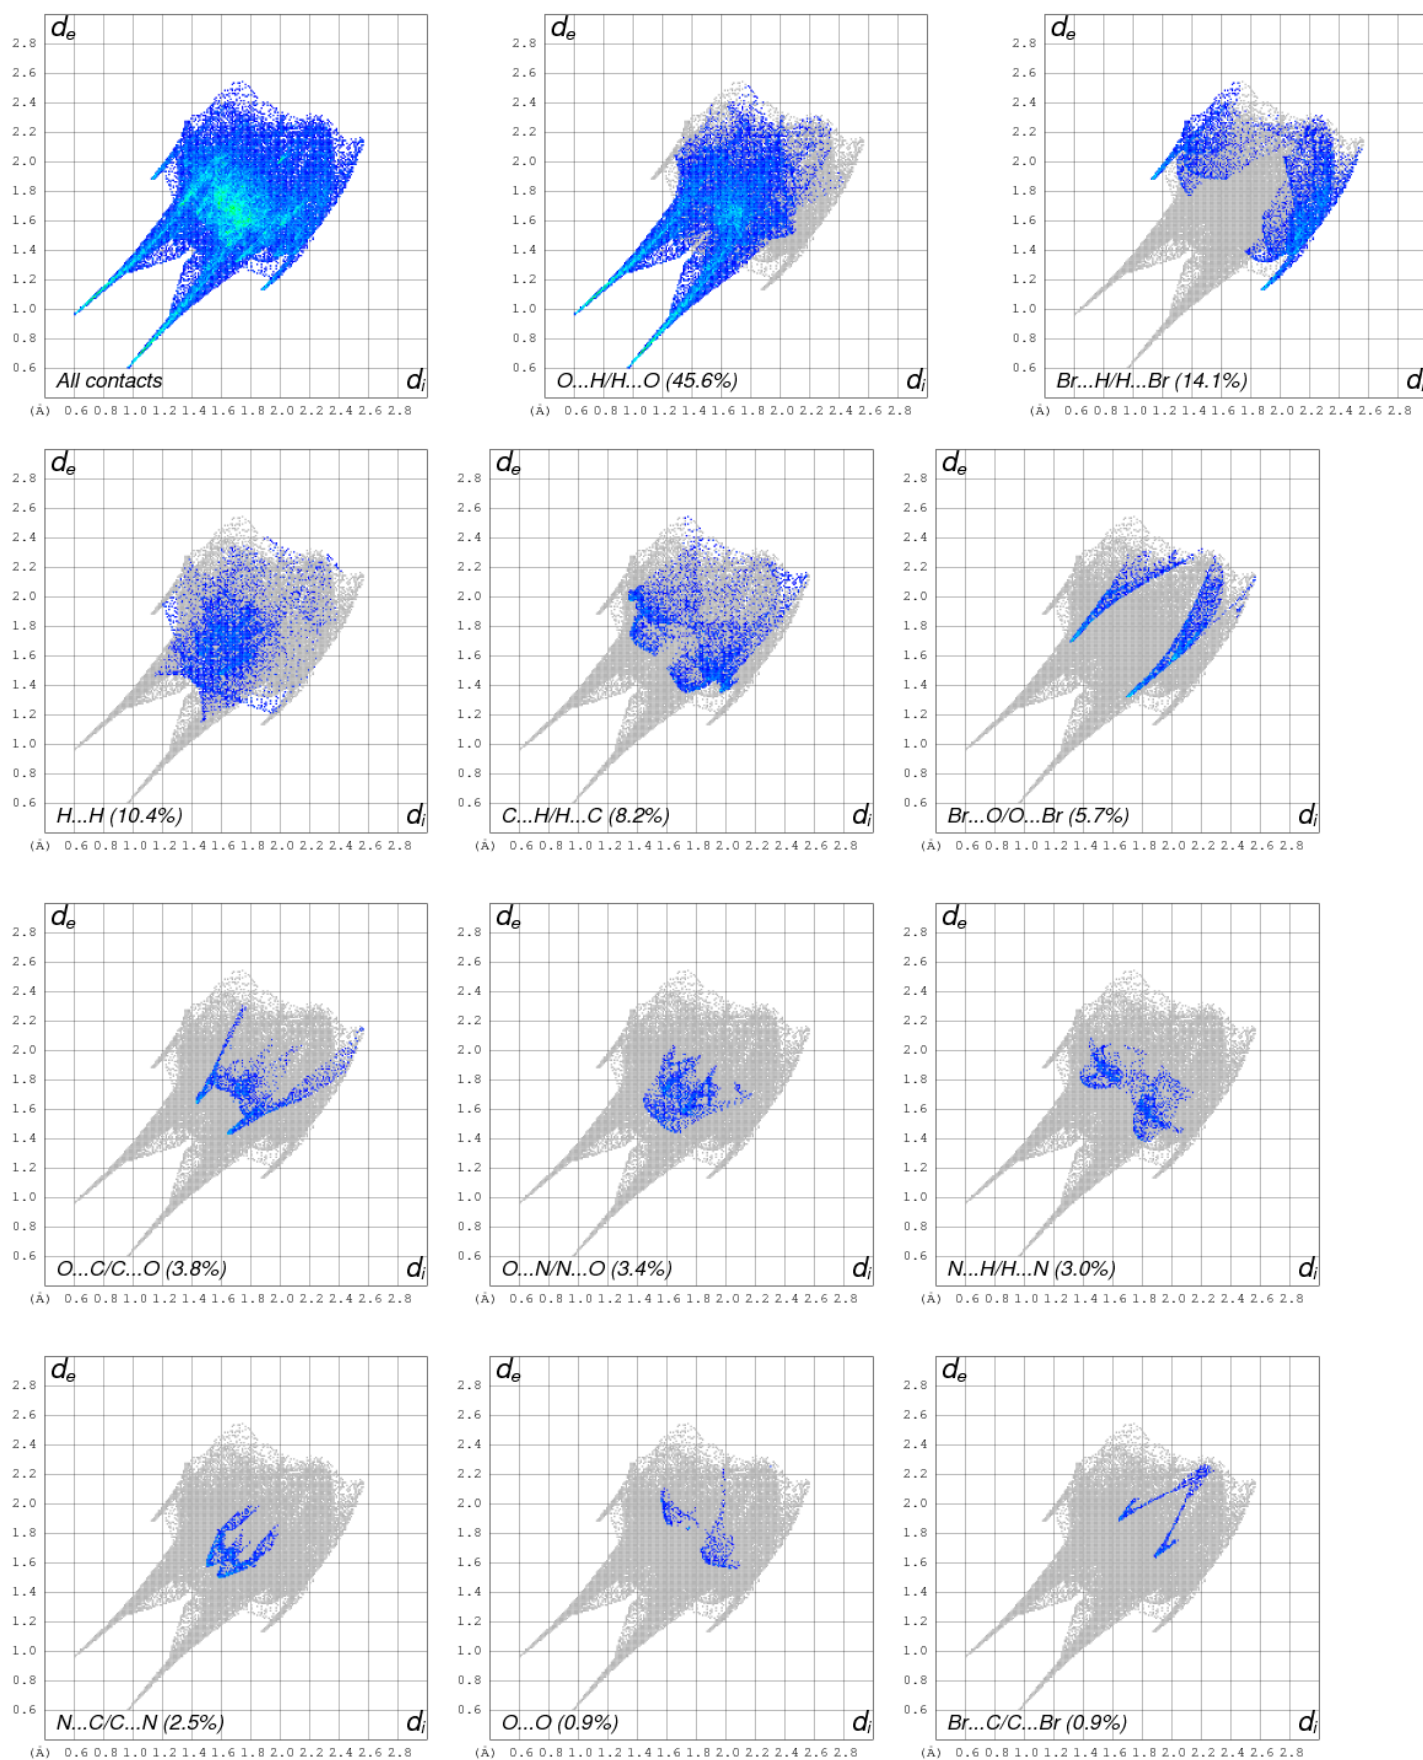

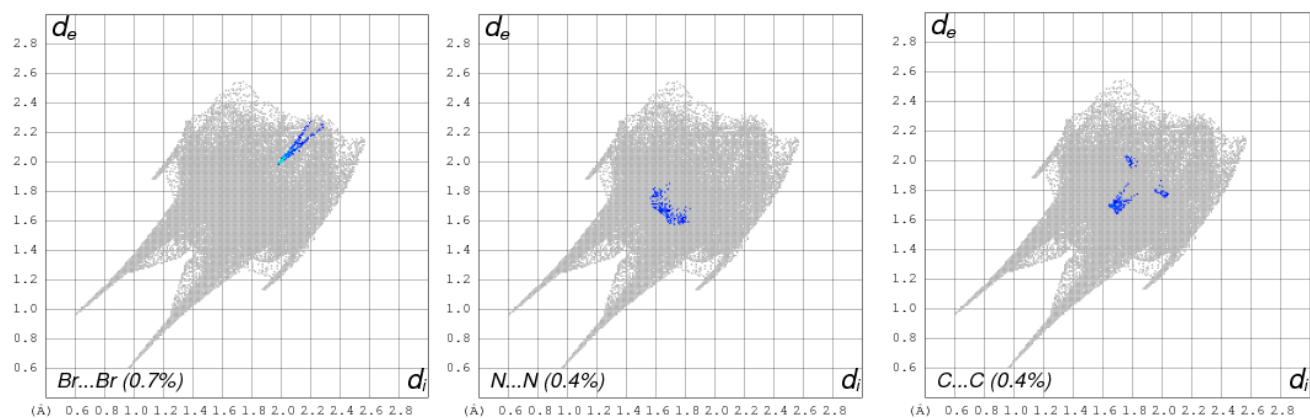

**Figures S5:** decomposed two-dimensional fingerprint plots for compound (V).

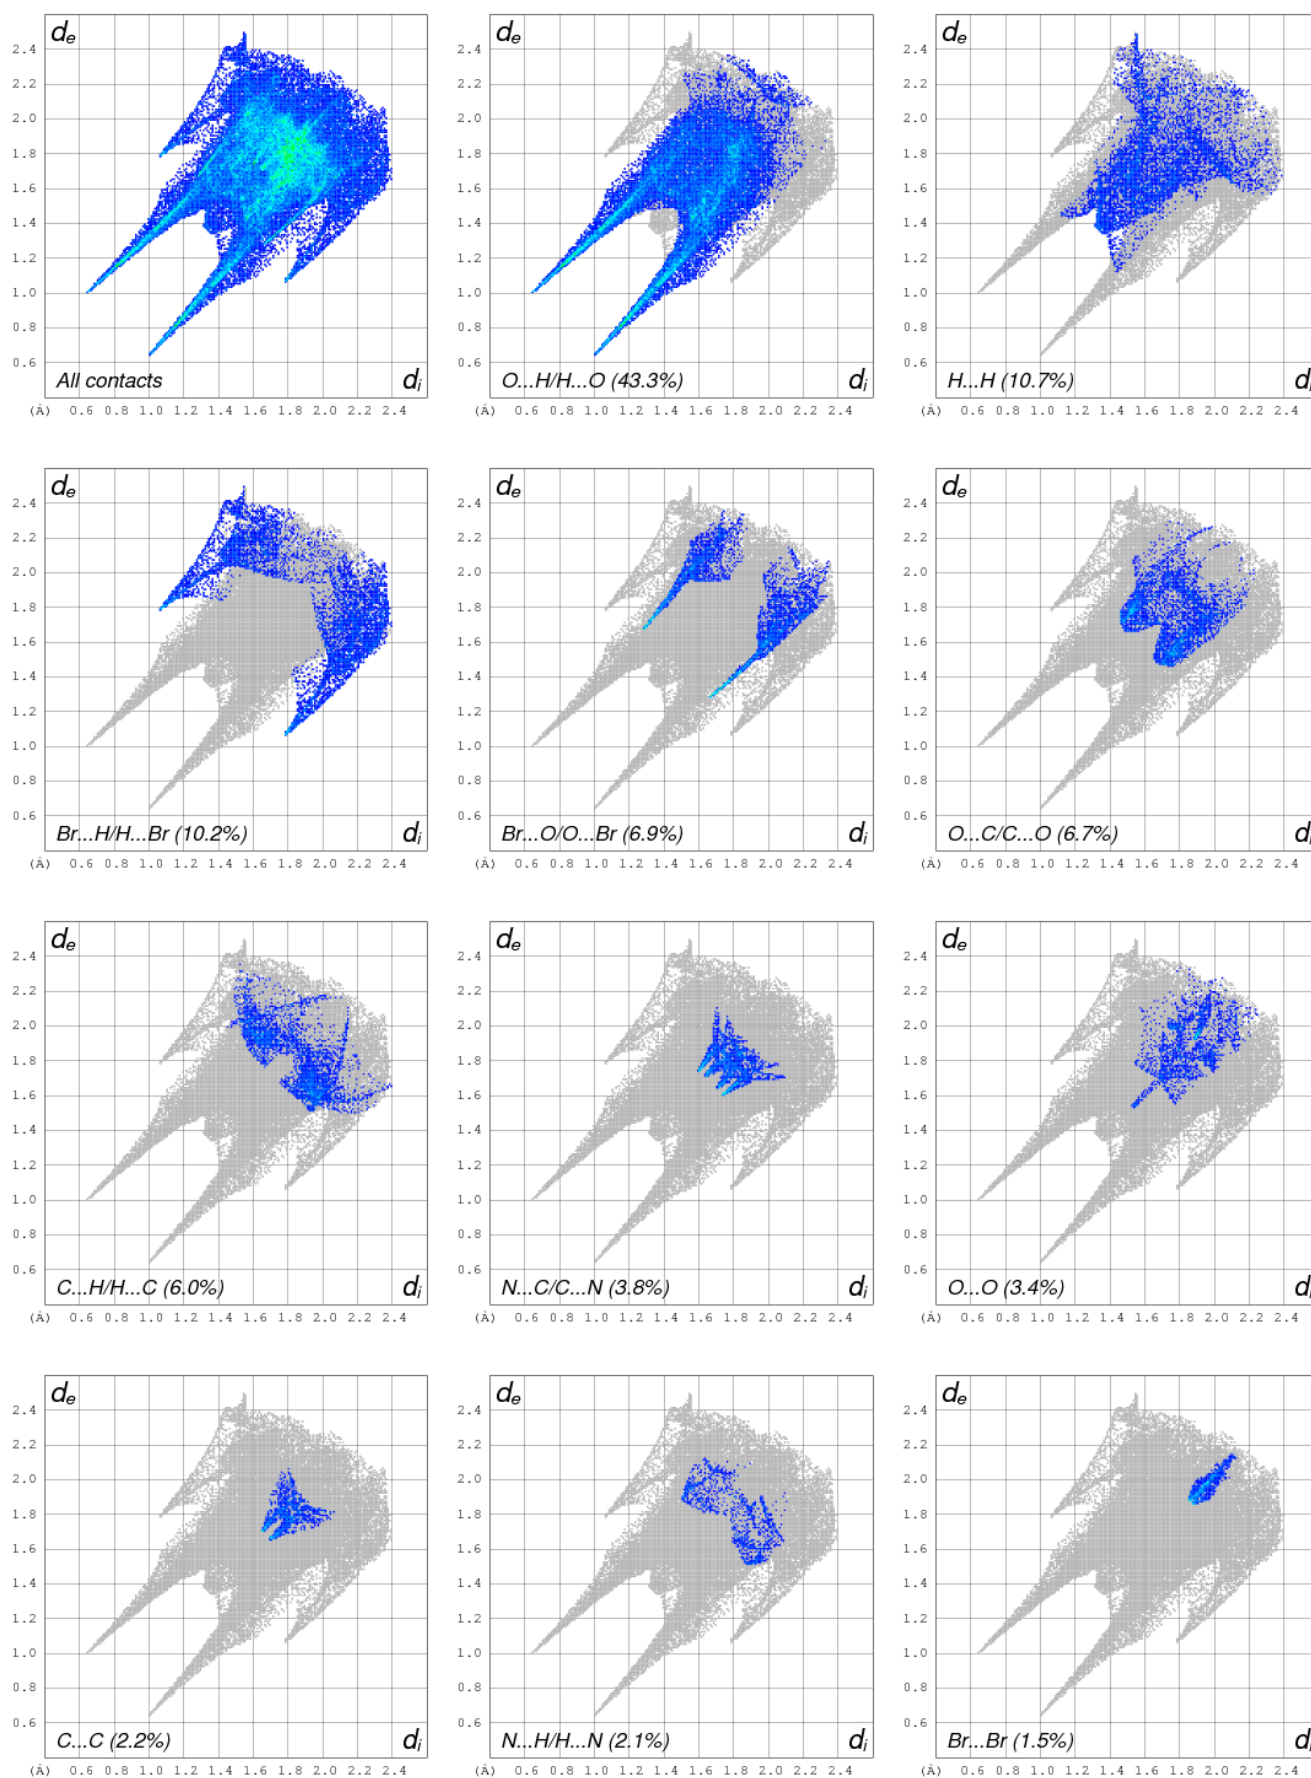

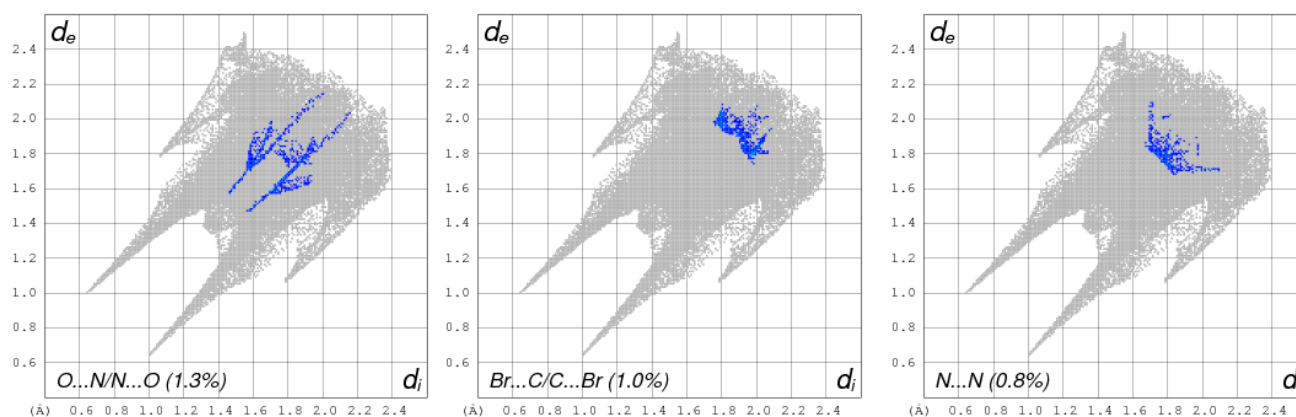

Figure 6. decomposed two-dimensional fingerprint plots for compound (VI).

Table S1. List of Bond-critical-points for the HBs emerged from the structural analysis (see Table 1), corresponding geometrical parameters ( $\text{\AA},^\circ$ ) and details of the topological analysis at the bond-CP for compound (I);  $\rho$  = electron density;  $\nabla^2\rho$  = Laplacian of the electron density.

| HB                                       | Atomic Index<br>(see indicated<br>cartesian<br>coordinates) | Index of<br>Bond- CP <sup>c</sup> | D—H  | H...A | D...A | D—H...A | $\rho$ | $\nabla^2\rho$ |
|------------------------------------------|-------------------------------------------------------------|-----------------------------------|------|-------|-------|---------|--------|----------------|
| N2—H2A...Cl1                             | 40-42-48 <sup>a</sup>                                       | 151                               | 0.98 | 2.46  | 3.34  | 148     | 0.015  | 0.043          |
| N2—H2B...Cl1C                            | 40-41-49 <sup>a</sup>                                       | 143                               | 0.98 | 2.23  | 3.16  | 156     | 0.021  | 0.067          |
| N1—H1...O1B                              | 33-34-29 <sup>a</sup>                                       | 97                                | 0.98 | 1.79  | 2.76  | 167     | 0.034  | 0.11           |
| N3—H3...Cl1                              | 27-38-48 <sup>a</sup>                                       | 150                               | 0.98 | 2.24  | 3.17  | 158     | 0.024  | 0.059          |
| N2A—H2A1...Cl1A                          | 2-3-15 <sup>a</sup>                                         | 73                                | 1.00 | 2.24  | 3.12  | 147     | 0.023  | 0.064          |
| N2A—H2A2...O1A <sup>i</sup>              | 19-69-50 <sup>b</sup>                                       | 133                               | 0.99 | 2.46  | 3.38  | 155     | 0.0091 | 0.028          |
| N1A—H1A...Cl1 <sup>ii</sup>              | 13-70-10 <sup>b</sup>                                       | 89                                | 0.99 | 2.52  | 3.37  | 144     | 0.024  | 0.038          |
| N3A—H3A...Cl1A                           | 13-14-15 <sup>a</sup>                                       | 82                                | 1.04 | 2.05  | 3.03  | 156     | 0.034  | 0.079          |
| N2B—H2B1...O2 <sub>w</sub>               | 19-20-30 <sup>a</sup>                                       | 67                                | 1.00 | 1.00  | 2.83  | 152     | 0.027  | 0.082          |
| N2B—H2B2...Cl1A                          | 19-21-15 <sup>a</sup>                                       | 75                                | 1.01 | 2.19  | 3.13  | 156     | 0.023  | 0.072          |
| N1B—H1B...O1                             | 26-27-36 <sup>a</sup>                                       | 130                               | 1.01 | 1.79  | 2.77  | 163     | 0.034  | 0.11           |
| N3B—H3B...Cl1B                           | 16-17-47 <sup>a</sup>                                       | 69                                | 1.06 | 1.88  | 2.92  | 171     | 0.050  | 0.096          |
| N2C—H2C1...Cl1C                          | 61-63-49 <sup>a</sup>                                       | 146                               | 1.02 | 2.14  | 3.06  | 149     | 0.028  | 0.074          |
| N1C—H1C...Cl1B <sup>iii</sup>            | 13-70-10 <sup>b</sup>                                       | 89                                | 0.99 | 2.52  | 3.37  | 145     | 0.014  | 0.038          |
| N3C—H3C...Cl1C                           | 51-52-49 <sup>a</sup>                                       | 134                               | 1.04 | 2.097 | 3.05  | 152     | 0.031  | 0.075          |
| O2 <sub>w</sub> —H2A...Cl1B              | 30-31-47 <sup>a</sup>                                       | 66                                | 0.96 | 2.16  | 2.97  | 142     | 0.026  | 0.076          |
| O2 <sub>w</sub> —H2B...Cl1 <sup>iv</sup> | 11-79-10 <sup>b</sup>                                       | 84                                | 0.99 | 2.18  | 3.16  | 170     | 0.026  | 0.060          |

<sup>a</sup> See Coordinates in Cluster-Compound-I-1. <sup>b</sup> See Coordinates in Cluster-Compound-I-2 <sup>c</sup> For the coordinates of the critical point see atoms indicated with CP in the corresponding Cluster-Compound indicated in the first column.

Table S2. List of Bond-critical-points for the Halogen Bonds as emerged from the structural analysis, corresponding geometrical parameters ( $\text{\AA},^\circ$ ) and details of the topological analysis at the bond-CP for compound (I);  $\rho$  = electron density;  $\nabla^2\rho$  = Laplacian of the electron density.

| Atomic index<br>(see indicated<br>cartesian<br>coordinates) | Index of<br>Bond- CP <sup>c</sup> | X—Br | Br...O | C—Br...O | $\rho$ | $\nabla^2\rho$ |
|-------------------------------------------------------------|-----------------------------------|------|--------|----------|--------|----------------|
| 74-23-12 <sup>a</sup>                                       | 119                               | 1.84 | 3.18   | 175      | 0.015  | 0.043          |
| 43-44-54 <sup>a</sup>                                       | 99                                | 1.83 | 2.97   | 166      | 0.011  | 0.040          |

<sup>a</sup> See Coordinates in Cluster-Compound-I-1.

**Table S3.** List of Bond-critical-points for the HBs emerged from the structural analysis (see Table 2), corresponding geometrical parameters ( $\text{\AA}$ ,<sup>a</sup>) and details of the topological analysis at the bond-CP for compound (II);  $\rho$  = electron density;  $\nabla^2\rho$  = Laplacian of the electron density.

| HB                                               | Atomic index<br>(see indicated<br>cartesian<br>coordinates) | Index of<br>Bond- CP <sup>c</sup> | D—H  | H $\cdots$ A | D $\cdots$ A | D—H $\cdots$ A | $\rho$ | $\nabla^2\rho$ |
|--------------------------------------------------|-------------------------------------------------------------|-----------------------------------|------|--------------|--------------|----------------|--------|----------------|
| N2—H2A $\cdots$ O2 <sub>w</sub> <sup>i</sup>     | 32-34-5 <sup>a</sup>                                        | 54                                | 1.00 | 1.90         | 2.83         | 155            | 0.072  | 0.074          |
| N2—H2B $\cdots$ O2 <sub>w</sub>                  | 32-33-3 <sup>a</sup>                                        | 50                                | 1.00 | 1.81         | 2.78         | 162            | 0.033  | 0.094          |
| N1—H1 $\cdots$ Br2                               | 29-30-7 <sup>a</sup>                                        | 95                                | 1.01 | 2.20         | 3.21         | 174            | 0.030  | 0.052          |
| N3—H3 $\cdots$ O1 <sup>ii</sup>                  | 25-26-40 <sup>a</sup>                                       | 66                                | 0.99 | 1.74         | 2.72         | 172            | 0.035  | 0.099          |
| O2 <sub>w</sub> —H2B $\cdots$ Br2 <sup>iv</sup>  | 3-38-2 <sup>b</sup>                                         | 41                                | 0.94 | 2.25         | 3.20         | 172            | 0.013  | 0.035          |
| O2 <sub>w</sub> —H2A $\cdots$ Br2 <sup>iii</sup> | 8-22-7 <sup>a</sup>                                         | 96                                | 0.94 | 2.51         | 3.41         | 154            | 0.014  | 0.035          |

<sup>a</sup> See Coordinates in Cluster-Compound-II-1. <sup>b</sup> See Coordinates in Cluster-Compound-II-2 <sup>c</sup> For the coordinates of the critical point see atoms indicated with CP in the corresponding Cluster-Compound indicated in the first column.

**Table S4.** List of additional interactions as emerged from the structural analysis, corresponding geometrical parameters ( $\text{\AA}$ ,<sup>a</sup>) and details of the topological analysis at the bond-CP for compound (II);  $\rho$  = electron density;  $\nabla^2\rho$  = Laplacian of the electron density.

| Atomic Index<br>(see indicated<br>cartesian<br>coordinates) | Index of<br>Bond- CP <sup>c</sup> | X—Br | Br $\cdots$ Br | C—Br $\cdots$ Br | $\rho$ | $\nabla^2\rho$ |
|-------------------------------------------------------------|-----------------------------------|------|----------------|------------------|--------|----------------|
| 27-39-6 <sup>a</sup>                                        | 73                                | 1.85 | 3.43           | 160              | 0.010  | 0.028          |

<sup>a</sup> See Coordinates in Cluster-Compound-II-1.

**Table S5.** List of Bond-critical-points for the HBs emerged from the structural analysis (see Table 3), corresponding geometrical parameters ( $\text{\AA}$ ,<sup>a</sup>) and details of the topological analysis at the bond-CP for compound (III);  $\rho$  = electron density;  $\nabla^2\rho$  = Laplacian of the electron density.

| HB                                               | Atomic index<br>(see indicated<br>cartesian<br>coordinates) | Index of<br>Bond- CP <sup>c</sup> | D—H  | H $\cdots$ A | D $\cdots$ A | D—H $\cdots$ A | $\rho$ | $\nabla^2\rho$ |
|--------------------------------------------------|-------------------------------------------------------------|-----------------------------------|------|--------------|--------------|----------------|--------|----------------|
| N2—H2A $\cdots$ O3                               | 87-89-55 <sup>a</sup>                                       | 173                               | 0.96 | 1.88         | 2.83         | 173            | 0.029  | 0.090          |
| N2—H2B $\cdots$ O5 <sub>w</sub> <sup>i</sup>     | 87-88-15 <sup>b</sup>                                       | 45                                | 0.98 | 1.88         | 2.84         | 171            | 0.026  | 0.080          |
| N1—H1 $\cdots$ O4C <sup>ii</sup>                 | 95-95-97 <sup>a</sup>                                       | 109                               | 0.97 | 2.28         | 3.04         | 170            | 0.030  | 0.081          |
| N3—H3 $\cdots$ O2                                | 84-85-57 <sup>a</sup>                                       | 160                               | 0.98 | 1.83         | 2.81         | 174            | 0.033  | 0.098          |
| C6—H6 $\cdots$ O1C <sup>ii</sup>                 | 44-45-39 <sup>a</sup>                                       | 220                               | 1.01 | 2.44         | 3.0          | 150            | 0.0094 | 0.036          |
| N2C—H2CA $\cdots$ O3                             | 29-31-55 <sup>a</sup>                                       | 194                               | 0.96 | 2.02         | 2.95         | 163            | 0.022  | 0.065          |
| N2C—H2CB $\cdots$ O3C                            | 29-30-34 <sup>a</sup>                                       | 211                               | 0.96 | 2.10         | 3.04         | 169            | 0.019  | 0.051          |
| N1C—H1C $\cdots$ O3C <sup>i</sup>                | 42-43-38 <sup>a</sup>                                       | 218                               | 0.98 | 2.35         | 3.05         | 138            | 0.012  | 0.041          |
| N1C—H1C $\cdots$ O4C <sup>i</sup>                | 42-43-39 <sup>a</sup>                                       | 219                               | 0.98 | 2.34         | 3.31         | 172            | 0.012  | 0.035          |
| N3C—H3C $\cdots$ O2C                             | 84-85-57 <sup>a</sup>                                       | 114                               | 0.98 | 1.83         | 2.81         | 173            | 0.032  | 0.094          |
| O5 <sub>w</sub> —H52 $\cdots$ O1                 | 15-17-10 <sup>a</sup>                                       | 154                               | 0.92 | 1.91         | 2.83         | 170            | 0.024  | 0.087          |
| N2A—H2AA $\cdots$ O3A                            | 49-50-64 <sup>a</sup>                                       | 170                               | 0.97 | 1.99         | 2.96         | 173            | 0.022  | 0.068          |
| N2A—H2AB $\cdots$ O6 <sub>w</sub> <sup>iii</sup> | 87-88-15 <sup>a</sup>                                       | 164                               | 0.96 | 1.77         | 2.72         | 171            | 0.029  | 0.090          |
| N1A—H1A $\cdots$ O2B <sup>iv</sup>               | 42-43-39 <sup>a</sup>                                       | 218                               | 0.98 | 2.30         | 3.05         | 130            | 0.012  | 0.035          |
| N1A—H1A $\cdots$ O4B <sup>iv</sup>               | 42-43-38 <sup>a</sup>                                       | 219                               | 0.98 | 2.30         | 3.31         | 172            | 0.012  | 0.041          |
| N3A—H3A $\cdots$ O2A                             | 52-53-62 <sup>a</sup>                                       | 179                               | 0.97 | 1.97         | 2.94         | 176            | 0.023  | 0.070          |
| N2B—H2BA $\cdots$ O3A                            | 69-70-64 <sup>a</sup>                                       | 139                               | 0.96 | 1.94         | 2.88         | 165            | 0.026  | 0.077          |
| N2B—H2BB $\cdots$ O3B                            | 29-30-34 <sup>a</sup>                                       | 211                               | 0.96 | 2.10         | 3.04         | 169            | 0.019  | 0.051          |
| N1B—H1B $\cdots$ O4B                             | 94-95-97                                                    | 109                               | 0.97 | 2.55         | 3.51         | 168            | 0.013  | 0.043          |
| N3B—H3B $\cdots$ O2B                             | 26-27-33 <sup>a</sup>                                       | 226                               | 0.97 | 1.87         | 2.82         | 168            | 0.032  | 0.084          |
| O6 <sub>w</sub> —H61 $\cdots$ O1A                | 65-66-57 <sup>a</sup>                                       | 169                               | 0.92 | 1.95         | 2.87         | 173            | 0.022  | 0.079          |
| O6 <sub>w</sub> —H62 $\cdots$ O2A                | 65-67-83 <sup>a</sup>                                       | 135                               | 0.95 | 1.92         | 2.79         | 152            | 0.025  | 0.084          |

<sup>a</sup> See Coordinates in Cluster-Compound-III-1. <sup>b</sup> See Coordinates in Cluster-Compound-III-2 <sup>c</sup> For the coordinates of the critical point see atoms indicated with CP in the corresponding Cluster-Compound indicated in the first column.



**Table S6.** List of Bond-critical-points for Halogen Bonds as emerged from the structural analysis, corresponding geometrical parameters ( $\text{\AA}$ ,<sup>a</sup>) and details of the topological analysis at the bond-CP for compound (III);  $\rho$  = electron density;  $\nabla^2\rho$  = Laplacian of the electron density.

| <i>Atomic index<br/>(see indicated<br/>cartesian<br/>coordinates)</i> | <i>Index of<br/>Bond- CP<sup>d</sup></i> | <i>X—Br</i> | <i>Br···O</i> | <i>C—Br···O</i> | $\rho$ | $\nabla^2\rho$ |
|-----------------------------------------------------------------------|------------------------------------------|-------------|---------------|-----------------|--------|----------------|
| 91-10 <sup>a</sup>                                                    | 132                                      | 1.86        | 2.90          | 158             | 0.014  | 0.056          |
| 19-7 <sup>c</sup>                                                     | 114                                      | 1.86        | 3.07          | 155             | 0.010  | 0.039          |
| 18-15 <sup>a</sup>                                                    | 180                                      | 1.84        | 3.00          | 160             | 0.009  | 0.037          |
| 1-2 <sup>b</sup>                                                      | 41                                       | 1.85        | 2.92          | 164             | 0.012  | 0.051          |

<sup>a</sup>See Coordinates in Cluster-Compund-III-1. <sup>b</sup>See Coordinates in Cluster-Compund-III-2 <sup>c</sup>See Coordinates in Cluster-Compund-III-3 <sup>d</sup>For the coordinates of the critical point see atoms indicated with CP in the corresponding Cluster-Compund indicated in the first column.

**Table S7.** Interlayer Bond-CP interactions for compound (III), corresponding geometrical parameters ( $\text{\AA}$ ,<sup>a</sup>) and details of the topological analysis;  $\rho$  = electron density;  $\nabla^2\rho$  = Laplacian of the electron density.

| <i>Atomic index<br/>(see indicated cartesian<br/>coordinates)</i> | <i>Index of<br/>Bond- CP<sup>b</sup></i> | <i>X—Y</i> | $\rho$ | $\nabla^2\rho$ |
|-------------------------------------------------------------------|------------------------------------------|------------|--------|----------------|
| 52-56 <sup>a</sup>                                                | 190                                      | 3.10       | 0.0074 | 0.025          |
| 36-33 <sup>a</sup>                                                | 226                                      | 3.10       | 0.031  | 0.084          |

<sup>a</sup>See Coordinates in Cluster-Compund-III-1. <sup>b</sup>For the coordinates of the critical point see atoms indicated with CP in the corresponding Cluster-Compund indicated in the first column

**Table S8.** List of Bond-critical-points for the HBs emerged from the structural analysis (see Table 4), corresponding geometrical parameters ( $\text{\AA}$ ,<sup>a</sup>) and details of the topological analysis at the bond-CP for compound (IV);  $\rho$  = electron density;  $\nabla^2\rho$  = Laplacian of the electron density.

| <i>HB</i>                                | <i>Atomic<br/>index (see<br/>indicated<br/>cartesian<br/>coordinates)</i> | <i>Index of<br/>Bond-<br/>CP<sup>c</sup></i> | <i>D—H</i> | <i>H···A</i> | <i>D···A</i> | <i>D—H···A</i> | $\rho$ | $\nabla^2\rho$ |
|------------------------------------------|---------------------------------------------------------------------------|----------------------------------------------|------------|--------------|--------------|----------------|--------|----------------|
| N2—H2A···O2                              | 29-31-44 <sup>a</sup>                                                     | 63                                           | 1.02       | 2.07         | 3.03         | 153            | 0.029  | 0.090          |
| N2—H2B···O4 <sup>i</sup>                 | 29-30-27 <sup>a</sup>                                                     | 73                                           | 1.00       | 1.97         | 2.87         | 148            | 0.026  | 0.080          |
| N1—H1···O4 <sup>ii</sup>                 | 37-38-52 <sup>a</sup>                                                     | 107                                          | 1.01       | 2.08         | 3.02         | 154            | 0.030  | 0.081          |
| N3—H3···O3                               | 41-42-45 <sup>a</sup>                                                     | 68                                           | 1.02       | 2.01         | 3.02         | 173            | 0.033  | 0.098          |
| O6 <sub>w</sub> —H6A···O2 <sup>i</sup>   | 4-23-20 <sup>b</sup>                                                      | 35                                           | 0.98       | 1.58         | 2.48         | 173            | 0.0094 | 0.036          |
| O6 <sub>w</sub> —H6B···O3 <sup>iii</sup> | 20-21-19 <sup>a</sup>                                                     | 119                                          | 1.04       | 1.51         | 2.54         | 172            | 0.022  | 0.065          |
| O6 <sub>w</sub> —H6C···O5 <sup>iv</sup>  | 56-54-49 <sup>a</sup>                                                     | 128                                          | 1.08       | 1.34         | 2.43         | 177            | 0.019  | 0.051          |

<sup>a</sup>See Coordinates in Cluster-Compund-IV-1. <sup>b</sup>See Coordinates in Cluster-Compund-IV-2 <sup>c</sup>For the coordinates of the critical point see atoms indicated with CP in the corresponding Cluster-Compund indicated in the first column

**Table S9.** List of Bond-critical-points for Halogen Bonds as emerged from the structural analysis, corresponding geometrical parameters ( $\text{\AA}$ ,<sup>a</sup>) and details of the topological analysis at the bond-CP for compound (IV);  $\rho$  = electron density;  $\nabla^2\rho$  = Laplacian of the electron density.

| <i>Atomic index<br/>(see indicated<br/>cartesian<br/>coordinates)</i> | <i>Index of<br/>Bond- CP<sup>b</sup></i> | <i>X—Br</i> | <i>Br···O</i> | <i>C—Br···O</i> | $\rho$ | $\nabla^2\rho$ |
|-----------------------------------------------------------------------|------------------------------------------|-------------|---------------|-----------------|--------|----------------|
| 34-10 <sup>a</sup>                                                    |                                          | 1.86        | 3.08          | 175             | 0.0089 | 0.033          |

<sup>a</sup>See Coordinates in Cluster-Compund-IV-1. <sup>b</sup>For the coordinates of the critical point see atoms indicated with CP in the corresponding Cluster-Compund indicated in the first column.

**Table S10.** List of Bond-critical-points for the HBs emerged from the inter-chain ( $\text{SO}_4^{2-}/\text{H}_3\text{O}^+$ ) HBs in compound (IV). See coordinates on Compounds IV-3.

| <i>Atomic index<br/>(see indicated<br/>cartesian<br/>coordinates)</i> | <i>Index of<br/>Bond- CP</i> | <i>D—H</i> | <i>H···A</i> | <i>D···A</i> | <i>D—H···A</i> | $\rho$ | $\nabla^2\rho$ |
|-----------------------------------------------------------------------|------------------------------|------------|--------------|--------------|----------------|--------|----------------|
| 4-17-8                                                                | 28                           | 0.97       | 1.56         | 2.53         | 173            | 0.056  | 0.016          |
| 4-18-15                                                               | 40                           | 0.98       | 1.45         | 2.43         | 174            | 0.087  | 0.015          |
| 4-19-20                                                               | 30                           | 1.01       | 1.01         | 2.53         | 174            | 0.074  | 0.018          |

**Table S11.** List of Bond-critical-points for the HBs emerged from the structural analysis (see Table 5), corresponding geometrical parameters ( $\text{\AA},^\circ$ ) and details of the topological analysis at the bond-CP for compound (V);  $\rho$  = electron density;  $\nabla^2$  = Laplacian of the electron density.

| <i>HB</i>                 | <i>Atomic index<br/>(see indicated<br/>cartesian<br/>coordinates)</i> | <i>Index of<br/>Bond- CP<sup>c</sup></i> | <i>D—H</i> | <i>H···A</i> | <i>D···A</i> | <i>D—H···A</i> | $\rho$ | $\nabla^2\rho$ |
|---------------------------|-----------------------------------------------------------------------|------------------------------------------|------------|--------------|--------------|----------------|--------|----------------|
| N2—H2A···O3               | 40-41-18 <sup>a</sup>                                                 | 125                                      | 1.00       | 1.71         | 3.03         | 177            | 0.042  | 0.13           |
| N2—H2B···O1 <sup>i</sup>  | 1-35-2 <sup>b</sup>                                                   | 47                                       | 0.98       | 2.19         | 2.87         | 117            | 0.014  | 0.098          |
| N1—H1···O3 <sup>ii</sup>  | 1-2-28 <sup>a</sup>                                                   | 121                                      | 1.01       | 1.73         | 2.74         | 171            | 0.040  | 0.11           |
| N3—H3···O2                | 11-12-70 <sup>a</sup>                                                 | 150                                      | 0.99       | 1.78         | 2.77         | 175            | 0.036  | 0.11           |
| O4—H4···O2 <sup>iii</sup> | 58-59-65 <sup>a</sup>                                                 | 153                                      | 0.94       | 1.78         | 2.71         | 170            | 0.034  | 0.11           |
| O5—H5···O4 <sup>iv</sup>  | 67-68-60 <sup>a</sup>                                                 | 164                                      | 0.94       | 1.75         | 2.68         | 171            | 0.036  | 0.12           |

<sup>a</sup> See Coordinates in Cluster-Compound-V-1<sup>b</sup> See Coordinates in Cluster-Compound-V-2<sup>c</sup> For the coordinates of the critical point see atoms indicated with CP in the corresponding Cluster-Compound indicated in the first column**Table S12.** List of Bond-critical-points for Halogen Bonds as emerged from the structural analysis, corresponding geometrical parameters ( $\text{\AA},^\circ$ ) and details of the topological analysis at the bond-CP for compound (V);  $\rho$  = electron density;  $\nabla^2\rho$  = Laplacian of the electron density.

| <i>Atomic index<br/>(see indicated<br/>cartesian<br/>coordinates)</i> | <i>Index of<br/>Bond- CP<sup>b</sup></i> | <i>X—Br</i> | <i>Br···O</i> | <i>C—Br···O</i> | $\rho$ | $\nabla^2\rho$ |
|-----------------------------------------------------------------------|------------------------------------------|-------------|---------------|-----------------|--------|----------------|
| 1-5 <sup>a</sup>                                                      |                                          | 1.86        | 3.09          | 171             | 0.094  | 0.032          |

<sup>a</sup> See Coordinates in Cluster-Compound-V-1. <sup>b</sup> For the coordinates of the critical point see atoms indicated with CP in the corresponding Cluster-Compound indicated in the first column**Table S13.** List of Bond-critical-points for the HBs emerged from the structural analysis (see Table 6), corresponding geometrical parameters ( $\text{\AA},^\circ$ ) and details of the topological analysis at the bond-CP for compound (VI);  $\rho$  = electron density;  $\nabla^2\rho$  = Laplacian of the electron density.

| <i>HB</i>                                | <i>Atomic index<br/>(see indicated<br/>cartesian<br/>coordinates)</i> | <i>Index of<br/>Bond- CP<sup>c</sup></i> | <i>D—H</i> | <i>H···A</i> | <i>D···A</i> | <i>D—H···A</i> | $\rho$ | $\nabla^2\rho$ |
|------------------------------------------|-----------------------------------------------------------------------|------------------------------------------|------------|--------------|--------------|----------------|--------|----------------|
| N2—H21···O2 <sup>i</sup>                 | 10-11-23 <sup>a</sup>                                                 | 60                                       | 1.01       | 1.89         | 2.89         | 171            | 0.030  | 0.077          |
| N2—H22···O6 <sub>w</sub> <sup>ii</sup>   | 10-12-18 <sup>a</sup>                                                 | 54                                       | 0.99       | 2.52         | 3.48         | 162            | 0.070  | 0.027          |
| N1—H1···O2                               | 3-4-30 <sup>a</sup>                                                   | 113                                      | 1.00       | 1.88         | 2.87         | 168            | 0.039  | 0.079          |
| N3—H3···O3 <sup>i</sup>                  | 13-14-22 <sup>a</sup>                                                 | 85                                       | 1.00       | 1.83         | 2.83         | 174            | 0.034  | 0.088          |
| O5—H5···O6 <sub>w</sub>                  | 13-14-22 <sup>b</sup>                                                 | 60                                       | 0.97       | 1.67         | 2.63         | 167            | 0.043  | 0.10           |
| O6 <sub>w</sub> —H61···O1 <sup>iii</sup> | 15-16-22 <sup>a</sup>                                                 | 109                                      | 0.94       | 1.97         | 2.80         | 146            | 0.021  | 0.078          |
| O6 <sub>w</sub> —H62···O3 <sup>iv</sup>  | 35-36-29 <sup>a</sup>                                                 | 120                                      | 0.95       | 1.93         | 2.80         | 152            | 0.026  | 0.081          |

<sup>a</sup> See Coordinates in Cluster-Compound-VI-1. <sup>b</sup> See Coordinates in Cluster-Compound-VI-2 <sup>c</sup> For the coordinates of the critical point see atoms indicated with CP in the corresponding Cluster-Compound indicated in the first column

**Table S14.** List of Bond-critical-points for Halogen Bonds as emerged from the structural analysis, corresponding geometrical parameters ( $\text{\AA}$ ,<sup>a</sup>) and details of the topological analysis at the bond-CP for compound (VI);  $\rho$  = electron density;  $\nabla^2\rho$  = Laplacian of the electron density.

| <i>Atomic index<br/>(see indicated<br/>cartesian<br/>coordinates)</i> | <i>Index of<br/>Bond- CP<sup>b</sup></i> | <i>X—Br</i> | <i>Br···O</i> | <i>C—Br···O</i> | <i><math>\rho</math></i> | <i><math>\nabla^2\rho</math></i> |
|-----------------------------------------------------------------------|------------------------------------------|-------------|---------------|-----------------|--------------------------|----------------------------------|
| 39-32 <sup>a</sup>                                                    | 65                                       | 1.86        | 3.02          | 166             | 0.011                    | 0.035                            |

<sup>a</sup>See Coordinates in Cluster-Compound-V-1. <sup>b</sup>For the coordinates of the critical point see atoms indicated with CP in the corresponding Cluster-Compound indicated in the first column

**Table 15.** Cartesian coordinates, coordinates and index of the bond CP for all the cluster adopted in this work (see Tables S1-S14).

Cluster Compound I-1

|    |              |                |                |
|----|--------------|----------------|----------------|
| C  | -10.9038181  | -0.103156477   | 0.234030753    |
| N  | -10.9117632  | -1.36685801    | 0.462537944    |
| H  | -10.0721884  | -1.90505672    | 0.336937606    |
| H  | -11.7465496  | -1.81260037    | 0.763848245    |
| C  | -12.0295029  | 0.734283984    | 0.359329402    |
| Br | -13.6262341  | 3.11698392E-02 | 0.953261435    |
| C  | -11.8992300  | 2.00316596     | 2.17875261E-02 |
| H  | -12.7574692  | 2.63636613     | 7.68871009E-02 |
| N  | -10.7546206  | 2.52640486     | -0.381634682   |
| H  | -10.7292089  | 3.49334836     | -0.609451056   |
| C  | -9.59259796  | 1.79599535     | -0.500830054   |
| O  | -8.55300999  | 2.22788119     | -0.859184623   |
| N  | -9.76747990  | 0.483644366    | -0.172415093   |
| H  | -8.93531036  | -0.141272768   | -0.248301804   |
| Cl | -7.91799498  | -1.91802275    | -0.262032479   |
| N  | -2.56175089  | -1.72640944    | -0.460160792   |
| H  | -2.35510492  | -2.76212239    | -0.409128428   |
| C  | -3.81478572  | -1.26543689    | -0.472816437   |
| N  | -4.79191780  | -2.09458566    | -0.376671284   |
| H  | -4.61049652  | -3.08111668    | -0.292267859   |
| H  | -5.74097347  | -1.75746632    | -0.385489643   |
| C  | -3.98753595  | 0.146468073    | -0.589968860   |
| Br | -5.67045689  | 0.898352385    | -0.595008969   |
| C  | -2.88767195  | 0.891750932    | -0.688414454   |
| H  | -2.98377275  | 1.94754088     | -0.807869256   |
| N  | -1.67270136  | 0.354145885    | -0.643339932   |
| H  | -0.875147939 | 0.973715425    | -0.687372863   |
| C  | -1.43790114  | -0.972249210   | -0.541510105   |
| O  | -0.343694299 | -1.45805252    | -0.520052791   |
| O  | -4.47977066  | -4.69246101    | 0.715813994    |
| H  | -3.58015752  | -5.00313330    | 0.584422886    |

|    |             |                |                 |
|----|-------------|----------------|-----------------|
| H  | -5.01539183 | -5.36683989    | 1.10193551      |
| N  | 1.86749458  | 7.92336985E-02 | 7.90646672E-02  |
| H  | 1.08128989  | -0.505242169   | 2.34073307E-03  |
| C  | 1.66827643  | 1.39699423     | -4.55913395E-02 |
| O  | 0.602686465 | 1.89002001     | -0.262771457    |
| N  | 2.78881836  | 2.14332438     | 0.124472290     |
| H  | 2.68431687  | 3.11969519     | 0.161834896     |
| C  | 4.01957750  | 1.64691651     | 0.244005710     |
| N  | 5.00468111  | 2.47996259     | 0.292511642     |
| H  | 5.92546463  | 2.14838719     | 0.381009787     |
| H  | 4.83584261  | 3.44661450     | 0.240624368     |
| C  | 4.17017841  | 0.261332929    | 0.293466806     |
| Br | 5.79841757  | -0.543376148   | 0.441202492     |
| C  | 3.05527377  | -0.462800205   | 0.218991175     |
| H  | 3.12516165  | -1.44156539    | 0.271446407     |
| Cl | -1.77335978 | -4.54290533    | -0.510119140    |
| Cl | 3.22125673  | 5.28021717     | -8.60532448E-02 |
| Cl | 8.14796829  | 2.16599846     | 0.539164543     |
| C  | 10.9465408  | 8.62646848E-02 | 0.157271445     |
| N  | 9.72398376  | -0.427416593   | 0.184280768     |
| H  | 8.94285583  | 0.233629897    | 0.364347845     |
| C  | 9.38821507  | -1.74015570    | -4.66720783E-04 |
| O  | 8.27389145  | -2.13278747    | -1.49850990E-03 |
| N  | 10.4873610  | -2.55148697    | -0.175592020    |
| H  | 10.3388796  | -3.52726102    | -0.290696591    |
| C  | 11.7444277  | -2.09699988    | -0.197908163    |
| H  | 12.5433836  | -2.77726507    | -0.391630262    |
| C  | 12.0195131  | -0.813941002   | 1.44401966E-02  |
| Br | 13.7512531  | -0.184827909   | -3.67258005E-02 |
| N  | 11.0912561  | 1.36156750     | 0.259746879     |
| H  | 11.9996376  | 1.76259696     | 0.241212010     |
| H  | 10.2687063  | 1.96493983     | 0.360568553     |

## Coordinates and Index of Bond-Critical Points

|             |              |                |    |
|-------------|--------------|----------------|----|
| -2.99386859 | -4.84014606  | 0.214455560    | 66 |
| -4.59172297 | -3.65671396  | 8.99989307E-02 | 67 |
| -2.17910695 | -3.30476046  | -0.440034896   | 69 |
| -9.35637665 | -1.88730311  | 0.135041490    | 73 |
| -6.46226406 | -1.82222176  | -0.339574814   | 75 |
| -8.61754227 | -0.707358062 | -0.251511812   | 82 |
| -12.7816954 | 0.402237117  | 0.638229966    | 85 |
| -6.74379015 | -0.582299948 | -0.419195920   | 86 |

|              |              |                 |     |
|--------------|--------------|-----------------|-----|
| 0.565874219  | -0.819150031 | -0.195114627    | 97  |
| 7.11189890   | -1.35061562  | 0.163133472     | 99  |
| -4.78450966  | 0.499582052  | -0.592511296    | 109 |
| 4.95090389   | -0.119664460 | 0.365896076     | 114 |
| -7.19488001  | 1.54862094   | -0.741744518    | 119 |
| 12.8349257   | -0.515478015 | -1.00280913E-02 | 123 |
| -0.339574426 | 1.27133250   | -0.521597087    | 130 |
| 6.95792484   | 0.857454896  | 0.480147302     | 132 |
| 8.69542027   | 0.856335104  | 0.418497384     | 134 |
| 6.66888523   | 2.16397905   | 0.430844009     | 143 |
| 9.57512569   | 2.01359510   | 0.416971296     | 146 |
| 2.86916232   | 3.82520342   | 7.85132200E-02  | 150 |
| 4.26033974   | 4.04903460   | 0.127343625     | 151 |

## Cluster Compound I-2

|    |                 |             |                 |
|----|-----------------|-------------|-----------------|
| C  | -8.82845020     | -3.73910809 | -5.62907532E-02 |
| N  | -9.98403740     | -3.10145044 | -0.169312820    |
| C  | -10.1001921     | -1.75564694 | -7.17237070E-02 |
| N  | -8.89906216     | -1.14403975 | 0.137874946     |
| C  | -7.71554995     | -1.73704994 | 0.249742299     |
| C  | -7.70256042     | -3.12908483 | 0.171072021     |
| O  | -11.1113148     | -1.15283465 | -0.168649420    |
| N  | -6.66477585     | -1.00790834 | 0.401817501     |
| Br | -6.11563635     | -4.03405476 | 0.359521866     |
| Cl | -3.89751744     | -6.25733662 | 0.667999566     |
| O  | -0.994358599    | -6.74067593 | 1.64466667      |
| C  | -1.11163747     | -4.03993797 | -4.24891412E-02 |
| N  | -2.25709462     | -3.41536283 | 0.186855853     |
| C  | -2.37577152     | -2.06630182 | 0.199192792     |
| N  | -1.18773603     | -1.43778527 | -3.37153375E-02 |
| C  | -1.42343808E-02 | -2.01786780 | -0.260155529    |
| C  | 2.36953594E-04  | -3.41181612 | -0.288756907    |
| O  | -3.37804508     | -1.47491717 | 0.401329845     |
| N  | 1.02736962      | -1.27688468 | -0.417969137    |
| Br | 1.57121956      | -4.29620028 | -0.639026523    |
| Cl | -0.391194612    | 1.46364796  | -4.47531901E-02 |
| N  | -2.12413001     | 4.07612848  | -0.312770307    |
| C  | -3.37059212     | 4.36013269  | -0.383718073    |
| N  | -3.74149704     | 5.62401628  | -0.526548684    |
| C  | -5.01824427     | 6.07159185  | -0.626971960    |
| N  | -5.93700552     | 5.10491657  | -0.568904400    |
| C  | -5.65115976     | 3.81977844  | -0.401988477    |

---

|    |              |              |                 |
|----|--------------|--------------|-----------------|
| C  | -4.39918852  | 3.38825965   | -0.322598994    |
| O  | -5.27544737  | 7.22600555   | -0.757682920    |
| Br | -4.00603199  | 1.61704540   | -0.150236353    |
| O  | -0.126710609 | 5.79690456   | -1.29289436     |
| Cl | -1.92175877  | 8.03777218   | -0.410846740    |
| N  | 1.82497573   | 4.74575758   | 0.971341550     |
| C  | 2.74774146   | 5.70726252   | 1.04859710      |
| N  | 4.01531744   | 5.27152777   | 0.839131534     |
| C  | 4.37429094   | 4.02305365   | 0.578700066     |
| C  | 3.34169006   | 3.05635190   | 0.504496098     |
| C  | 2.09756708   | 3.47773576   | 0.690338671     |
| O  | 2.50131011   | 6.84776545   | 1.28190529      |
| N  | 5.61374521   | 3.74809813   | 0.412833542     |
| Br | 3.71998620   | 1.30432737   | 0.174674109     |
| Cl | 5.83049202   | 7.69117880   | 0.800566256     |
| Cl | 7.32193375   | 1.16757560   | -0.155446544    |
| N  | 6.51958609   | -1.72635984  | -0.340627640    |
| C  | 5.31845665   | -2.33796692  | -0.550227284    |
| N  | 5.43461084   | -3.68377018  | -0.647816420    |
| C  | 6.59019899   | -4.32142830  | -0.534793377    |
| C  | 7.71608829   | -3.71140480  | -0.307430595    |
| C  | 7.70309877   | -2.31937003  | -0.228760317    |
| O  | 4.30733347   | -1.73515463  | -0.647153020    |
| N  | 8.75387287   | -1.59022832  | -7.66850933E-02 |
| Br | 9.30301094   | -4.61637545  | -0.118980728    |
| H  | 8.67257214   | -0.621317089 | -4.50388007E-02 |
| H  | 9.62858868   | -2.00764465  | 7.18642073E-03  |
| H  | 4.62966394   | -4.20615482  | -0.807739675    |
| H  | 6.51760244   | -0.756029606 | -0.270946085    |
| H  | 6.59664679   | -5.28994226  | -0.626119316    |
| H  | 6.28261232   | 4.45144176   | 0.478611380     |
| H  | 5.88773918   | 2.83459044   | 0.220921665     |
| H  | 0.897308409  | 4.99115419   | 1.13138294      |
| H  | 4.66906595   | 5.99108601   | 0.874488652     |
| H  | 1.36541724   | 2.84127712   | 0.617698133     |
| H  | -1.45872855  | 4.78394604   | -0.364107460    |
| H  | -1.84134495  | 3.15126705   | -0.207582474    |
| H  | -6.87194777  | 5.35970736   | -0.654717088    |
| H  | -3.08935618  | 6.34564877   | -0.545476973    |
| H  | -6.37917757  | 3.17798376   | -0.334986359    |
| H  | 0.946529031  | -0.308566928 | -0.370790422    |
| H  | 1.89466465   | -1.68471646  | -0.584922075    |



|   |              |                 |                 |
|---|--------------|-----------------|-----------------|
| H | -3.05237079  | -3.95023513     | 0.353731871     |
| H | -1.19164109  | -0.464973778    | -2.89705936E-02 |
| H | -1.10199356  | -5.01257801     | -2.58154292E-02 |
| H | -6.74607611  | -3.89970243E-02 | 0.433462828     |
| H | -5.79005909  | -1.42532480     | 0.485688031     |
| H | -10.7889843  | -3.62383485     | -0.329236120    |
| H | -8.90104580  | -0.173709676    | 0.207556531     |
| H | -8.82200241  | -4.70762110     | -0.147616729    |
| H | -0.690045774 | -7.66314363     | 1.59130204      |
| H | -1.93761408  | -6.67311430     | 1.41640377      |
| H | -0.431560308 | 6.72006750      | -1.25770748     |
| H | 0.801266909  | 5.74907160      | -1.58093834     |

## Coordinates and Index of Bond-Critical Points

|              |                 |                 |     |
|--------------|-----------------|-----------------|-----|
| -2.55166960  | -6.53612947     | 1.16981447      | 84  |
| -1.01596332  | -5.68316603     | 0.647734940     | 86  |
| -5.05620575  | -5.12078524     | 0.508411288     | 87  |
| -3.30805659  | -4.74754286     | 0.455213487     | 89  |
| -6.92042923  | -3.57021070     | 0.262688428     | 93  |
| 0.734074652  | -3.82153821     | -0.450822920    | 100 |
| 3.50922608   | -4.07099867     | -0.684339046    | 102 |
| -4.71281862  | -2.57815313     | 0.381235391     | 106 |
| 8.46772003   | -4.13908195     | -0.219116092    | 108 |
| 3.01446629   | -2.87609267     | -0.640274286    | 119 |
| -4.86606169  | -1.46457255     | 0.433788627     | 122 |
| 2.83324695   | -1.73266375     | -0.593561172    | 133 |
| -3.63830996  | 2.40634698E-02  | 0.149832547     | 140 |
| -5.67678404  | 0.464849919     | 0.163263723     | 143 |
| -0.916035712 | 0.138061538     | -3.53162698E-02 | 147 |
| 4.07014036   | -0.270628244    | -0.270842791    | 149 |
| 0.466497421  | 0.250637591     | -0.257449895    | 151 |
| 2.01707125   | 0.201552987     | -0.125616059    | 152 |
| 6.79242373   | -0.159232229    | -0.234361455    | 154 |
| 8.19252968   | -5.86449429E-02 | -8.62605944E-02 | 156 |
| -2.18040252  | 1.63009834      | -0.105651870    | 157 |
| 5.54945326   | 1.31181097      | 2.29166206E-02  | 159 |
| -4.21229219  | 2.55076718      | -0.240480542    | 160 |
| 0.753769100  | 2.36663914      | 0.381406784     | 161 |
| -1.34995008  | 2.60776186      | -0.157313809    | 163 |
| 3.52102542   | 2.23334265      | 0.348858029     | 164 |
| 6.37593031   | 2.29570293      | 0.101544626     | 166 |
| -0.970195413 | 5.10914755      | -0.724772036    | 187 |

|              |            |                 |     |
|--------------|------------|-----------------|-----|
| 0.775768936  | 5.28513241 | -9.84050259E-02 | 190 |
| -2.72593236  | 6.86747789 | -0.499488115    | 197 |
| 5.03235674   | 6.51583624 | 0.847197592     | 199 |
| -0.922646284 | 7.11523438 | -0.968295753    | 200 |

## Cluster Compound II-1

|    |                |                 |                 |
|----|----------------|-----------------|-----------------|
| C  | -2.54300523    | -1.06742203     | -2.72599813E-02 |
| Br | -2.34650922    | -4.99265194     | -8.90006274E-02 |
| O  | 0.682407916    | -3.50032759     | 0.419962674     |
| C  | 1.98941839     | -1.15587991E-02 | 4.95685451E-02  |
| O  | 4.57327461     | -2.87516904     | 0.386109442     |
| Br | 7.59437180     | -1.38147831     | -0.163685739    |
| Br | 6.77052438E-02 | 5.55897713      | -7.35200420E-02 |
| O  | -2.95177674    | 4.06226969      | 0.476944089     |
| N  | -3.50523734    | -1.99721193     | -8.58693644E-02 |
| C  | -4.78117704    | -1.69256616     | -7.24684596E-02 |
| C  | -5.21295404    | -0.434528500    | -5.11568524E-02 |
| C  | -4.25333500    | 0.590222299     | -3.79560776E-02 |
| N  | -2.98740673    | 0.214858025     | -1.87870692E-02 |
| Br | -7.01775026    | -3.19855250E-02 | -4.62564193E-02 |
| H  | -5.44402266    | -2.51215529     | -8.99294689E-02 |
| H  | -3.18949294    | -2.97146368     | -9.71696004E-02 |
| H  | -2.25964522    | 0.903240681     | -2.58017872E-02 |
| N  | -4.53168726    | 1.83992636      | -3.72342691E-02 |
| H  | -5.47109365    | 2.11550617      | -4.76992577E-02 |
| H  | -3.84493589    | 2.56917882      | 2.54370272E-02  |
| H  | -2.79112816    | 3.98029017      | 1.39015138      |
| H  | -2.12780285    | 4.29501343      | 7.69672319E-02  |
| C  | 0.290049374    | 1.65288663      | -4.47126366E-02 |
| O  | -0.872611403   | 1.89418530      | -7.60197863E-02 |
| N  | 0.723490596    | 0.376839459     | 9.16009117E-03  |
| H  | 1.07425703E-02 | -0.309099138    | 2.43642344E-03  |
| C  | 2.96965623     | 1.01413321      | 3.53265442E-02  |
| C  | 2.53450084     | 2.25837111      | -1.38871446E-02 |
| N  | 1.23619115     | 2.57370687      | -4.41630073E-02 |
| H  | 0.931662202    | 3.53820896      | -7.70525187E-02 |
| H  | 3.19236183     | 3.08073878      | -3.65566798E-02 |
| N  | 2.27113032     | -1.24967360     | 7.15355948E-02  |
| H  | 1.57892990     | -1.96722496     | 6.67805895E-02  |
| H  | 3.21107745     | -1.58556044     | 0.105132826     |
| H  | 5.41988897     | -2.61603761     | 5.08706719E-02  |

|    |              |             |                |
|----|--------------|-------------|----------------|
| H  | 4.67816877   | -3.00804925 | 1.30071688     |
| H  | 0.537474930  | -3.42459559 | 1.33601511     |
| H  | -0.144473240 | -3.72907281 | 3.43858898E-02 |
| Br | 4.76127291   | 0.545673251 | 2.80581340E-02 |
| O  | -1.40131640  | -1.32770264 | 1.20363040E-02 |

## Coordinates and Index of Bond-Critical Points

|              |              |                 |    |
|--------------|--------------|-----------------|----|
| -0.862939119 | -4.15169716  | 2.81272661E-02  | 41 |
| -2.93508887  | -3.58501554  | -9.35782939E-02 | 42 |
| -0.408371031 | -2.41236591  | 0.202707157     | 49 |
| 1.26204050   | -2.48952603  | 0.191812649     | 50 |
| 3.67732048   | -2.04206538  | 0.216945872     | 54 |
| 6.11606789   | -2.20376420  | 6.71103131E-03  | 58 |
| -6.05500841  | -0.243756354 | -4.88108583E-02 | 62 |
| 4.44241810   | -1.26558888  | 0.231653884     | 65 |
| -0.496863127 | -0.626968205 | 6.99432893E-03  | 66 |
| 6.06402349   | -0.412107378 | -6.85489848E-02 | 73 |
| -1.77124488  | 1.20534360   | -4.25926708E-02 | 77 |
| 3.84134483   | 0.787184238  | 3.27881090E-02  | 78 |
| -3.53733873  | 3.07216668   | 0.185950845     | 87 |
| -1.87081778  | 2.98126507   | 0.193598241     | 89 |
| 0.666086435  | 4.15482569   | -7.42995217E-02 | 95 |
| -1.41841447  | 4.71670485   | 6.14446849E-02  | 96 |

## Cluster Compound II-2

|    |              |                 |                 |
|----|--------------|-----------------|-----------------|
| Br | -1.89564681  | 2.60405970      | -8.95667151E-02 |
| O  | -3.70130730  | 0.194082052     | 1.50995874      |
| Br | -3.85271263  | -1.86141884     | -0.916693509    |
| C  | 0.321693003  | -0.329891860    | 1.29794395      |
| O  | -0.721082926 | -0.472576201    | 1.76223183      |
| N  | 1.33543062   | -1.24621928     | 1.46502388      |
| H  | 1.06560385   | -2.03978992     | 1.97733307      |
| C  | 2.49638295   | -1.18302405     | 0.842070997     |
| N  | 3.35310841   | -2.14619827     | 1.02487695      |
| H  | 3.12831330   | -2.93814421     | 1.55228782      |
| H  | 4.19972277   | -2.14242244     | 0.535713077     |
| C  | 2.73758435   | -8.94172341E-02 | 3.84086184E-02  |
| Br | 4.35248423   | 9.00889561E-02  | -0.852792561    |
| C  | 1.74637949   | 0.823687851     | -0.120422043    |
| H  | 1.85836148   | 1.65452957      | -0.761276841    |
| N  | 0.621035099  | 0.726042867     | 0.490139961     |
| H  | -0.180853799 | 1.37374723      | 0.298062712     |

|   |             |              |             |
|---|-------------|--------------|-------------|
| H | -3.75056958 | -0.339111090 | 0.739301741 |
| H | -3.06507444 | 0.850096285  | 1.33960950  |

## Coordinates and Index of Bond-Critical Points

|              |                 |                |    |
|--------------|-----------------|----------------|----|
| -3.77530694  | -0.817218423    | 0.225815937    | 24 |
| 4.04877186   | -1.24742174     | 9.85253155E-02 | 28 |
| -2.14464688  | -8.47525075E-02 | 1.61535680     | 31 |
| 3.48664594   | -9.22151003E-03 | -0.373508722   | 37 |
| -2.68623137  | 1.42987263      | 0.832833648    | 39 |
| -0.690394700 | 1.74575448      | 0.178416371    | 42 |

## Cluster Compound III-1

|    |                |              |                |
|----|----------------|--------------|----------------|
| Br | -11.6176443    | -1.48835874  | -1.17361534    |
| C  | -9.80480671    | -1.56494701  | -0.852052569   |
| C  | -9.07887840    | -0.386846751 | -0.666148484   |
| N  | -9.55385399    | 0.797546446  | -0.782762408   |
| H  | -10.4731855    | 0.980765939  | -0.981208146   |
| H  | -8.97403049    | 1.55464292   | -0.704574347   |
| N  | -7.79533958    | -0.538104236 | -0.334480911   |
| H  | -7.29195070    | 0.288860023  | -0.194215387   |
| C  | -7.12705517    | -1.70964527  | -0.229024068   |
| O  | -5.99065495    | -1.76435959  | 2.45438330E-02 |
| N  | -7.88001156    | -2.79618263  | -0.465776742   |
| H  | -7.44522476    | -3.66857123  | -0.521624088   |
| C  | -9.17261791    | -2.73069715  | -0.754538476   |
| H  | -9.69514084    | -3.58842564  | -0.906344354   |
| O  | -3.97182202    | 0.142306492  | 0.567910194    |
| H  | -4.53324795    | 0.897747040  | 0.464387268    |
| H  | -4.58893442    | -0.498787165 | 0.324762404    |
| Br | -2.63332462    | 2.91035557   | 0.582886875    |
| C  | -2.29489923    | 4.71720266   | 0.624777615    |
| C  | -3.25814843    | 5.58058119   | 0.405611575    |
| H  | -4.20170975    | 5.24551868   | 0.243181214    |
| N  | -3.01468444    | 6.89455318   | 0.393546492    |
| H  | -3.74714828    | 7.50316668   | 0.213279918    |
| C  | -1.78251231    | 7.41899967   | 0.590547740    |
| O  | -1.55947065    | 8.56004524   | 0.569683909    |
| N  | -0.816731870   | 6.50046539   | 0.842965901    |
| H  | 7.43105561E-02 | 6.85021496   | 0.989787698    |
| C  | -0.972149968   | 5.19224691   | 0.876650393    |
| N  | 2.80696452E-02 | 4.44673777   | 1.12632394     |
| H  | 0.888132811    | 4.82191753   | 1.31784689     |

---

|    |                 |                |              |
|----|-----------------|----------------|--------------|
| H  | -6.73955306E-02 | 3.49874449     | 1.21307015   |
| N  | 2.60284281      | 7.21016788     | 1.69943357   |
| O  | 1.60998034      | 7.83061314     | 1.40048158   |
| O  | 2.58250952      | 5.99427509     | 1.71551764   |
| O  | 3.60079837      | 7.79459476     | 1.97892892   |
| N  | 2.68885970      | 7.49464369     | -1.48241460  |
| O  | 2.71439791      | 8.69123840     | -1.47406995  |
| O  | 1.67262077      | 6.89818621     | -1.75663888  |
| O  | 3.68651843      | 6.86364794     | -1.21620679  |
| C  | 2.20564866      | 2.79853797     | -1.34789765  |
| O  | 1.04161596      | 2.83620811     | -1.49635947  |
| N  | 2.97681856      | 3.89610934     | -1.26788080  |
| H  | 2.58717012      | 4.79095602     | -1.31870282  |
| C  | 4.28671074      | 3.84507704     | -1.09720302  |
| H  | 4.81858587      | 4.70867586     | -1.04723191  |
| C  | 4.91328955      | 2.68760371     | -0.989634395 |
| Br | 6.74511719      | 2.61732793     | -0.804183364 |
| C  | 4.17227554      | 1.50589418     | -1.04923356  |
| N  | 4.68292618      | 0.333873630    | -0.941525519 |
| H  | 4.14164639      | -0.461072743   | -1.03820133  |
| H  | 5.59469986      | 8.46756175E-02 | -0.770171642 |
| N  | 2.88333154      | 1.62526059     | -1.24922502  |
| H  | 2.36488152      | 0.807209969    | -1.23057222  |
| N  | 1.50507081      | 1.39909303     | 1.70971215   |
| O  | 0.306542993     | 1.53886139     | 1.53838682   |
| O  | 2.22901702      | 2.33939409     | 1.67450345   |
| O  | 1.92423415      | 0.285012960    | 1.90362084   |
| H  | -0.539708912    | 1.41801322     | -2.00754976  |
| H  | -0.728619933    | 0.247056812    | -2.76696610  |
| O  | -1.16643417     | 0.903872967    | -2.29077530  |
| N  | 1.68874907      | -1.88647556    | -1.31595731  |
| O  | 1.20469201      | -0.790581405   | -1.24959743  |
| O  | 1.00876975      | -2.87382913    | -1.30300689  |
| O  | 2.89345980      | -1.97997940    | -1.38099062  |
| O  | 4.17207527      | -1.28073597    | 2.44441462   |
| H  | 3.60806704      | -0.521762609   | 2.34041333   |
| H  | 3.55550861      | -1.92125070    | 2.20148015   |
| C  | 4.27654839      | -5.56620264    | -0.901003659 |
| N  | 3.26222563      | -4.81967497    | -1.09378338  |
| H  | 3.30675197      | -3.85767961    | -1.15324306  |
| H  | 2.38129759      | -5.17427826    | -1.22809100  |
| N  | 4.10202026      | -6.88356829    | -0.914425731 |

|    |                 |              |              |
|----|-----------------|--------------|--------------|
| H  | 3.25716686      | -7.28961611  | -1.16366506  |
| C  | 5.07630396      | -7.81707525  | -0.742148161 |
| O  | 4.85468483      | -8.95746708  | -0.764178395 |
| N  | 6.29605484      | -7.29016638  | -0.533868015 |
| H  | 7.04771042      | -7.93187904  | -0.369205087 |
| C  | 6.54404354      | -5.98718405  | -0.502988040 |
| H  | 7.49419832      | -5.66495132  | -0.348659664 |
| C  | 5.58138180      | -5.10349035  | -0.671180665 |
| Br | 5.91594172      | -3.29838037  | -0.616418123 |
| C  | 0.975514650     | -3.14704037  | 1.63569057   |
| O  | 2.11548877      | -3.20195818  | 1.89005637   |
| N  | 0.312059671     | -1.98388338  | 1.53096473   |
| H  | 0.817311704     | -1.15392888  | 1.67173624   |
| C  | -0.955564678    | -1.83446836  | 1.20340657   |
| N  | -1.42789471     | -0.656634390 | 1.08740795   |
| H  | -2.34668064     | -0.473518103 | 0.889073133  |
| H  | -0.844684482    | 0.104869224  | 1.16603327   |
| C  | -1.67962515     | -3.00946832  | 1.01799679   |
| Br | -3.49174500     | -2.93286228  | 0.696534157  |
| C  | -1.05930281     | -4.17646551  | 1.11281633   |
| H  | -1.58156180     | -5.03363848  | 0.961096048  |
| N  | 0.219448105     | -4.23800087  | 1.39799154   |
| H  | 0.653763115     | -5.10951233  | 1.34222078   |
| N  | 0.921222866     | -7.88190413  | 1.43237174   |
| O  | -7.76122063E-02 | -7.25771523  | 1.13159895   |
| O  | 0.899777353     | -9.07929993  | 1.45310581   |
| O  | 1.93390548      | -7.28979397  | 1.71066034   |

## Coordinates and Index of Bond-Critical Points

|             |              |              |     |
|-------------|--------------|--------------|-----|
| 2.99356222  | -7.09523106  | 0.413861096  | 105 |
| 0.343261600 | -5.90362072  | 1.26408029   | 109 |
| 2.64589143  | -4.02742434  | 0.432842880  | 124 |
| -2.51534605 | -2.97283530  | 0.868673384  | 126 |
| 5.73852015  | -4.24166489  | -0.646581769 | 129 |
| -4.82732630 | -2.26287961  | 0.319342792  | 132 |
| 2.99500775  | -2.37638950  | 2.08592105   | 135 |
| 0.767053902 | -2.59871531  | 0.155524805  | 136 |
| -10.6735935 | -1.52614200  | -1.00755179  | 137 |
| 3.14512610  | -3.19002819  | -1.23901117  | 139 |
| 4.17872286  | -2.77396274  | -1.02928293  | 144 |
| -3.89808345 | -1.27480793  | 0.573586822  | 147 |
| -5.13285255 | -0.943257391 | 0.214731067  | 154 |



|                |                 |                 |     |
|----------------|-----------------|-----------------|-----|
| 0.780386686    | -1.47452796     | 9.18099657E-02  | 155 |
| 1.18994546     | -0.631114542    | 1.74964964      | 160 |
| -2.92532659    | -0.234132558    | 0.775062799     | 164 |
| 2.98914742     | -0.208736017    | 2.17119980      | 169 |
| 3.65287471     | -0.995674729    | -1.16729331     | 170 |
| 1.51436591     | -0.309978813    | 0.344609082     | 171 |
| -0.407216221   | 0.596935332     | 1.31152046      | 173 |
| 1.94849521E-02 | -6.72758818E-02 | -1.88310528     | 174 |
| 1.96617532     | 0.207975507     | -1.24120688     | 179 |
| -3.53649950    | 1.52732110      | 0.538044214     | 180 |
| -1.83321035    | 1.81162524      | -0.999548614    | 186 |
| -0.948803067   | 2.31816220      | 1.10431278      | 188 |
| 2.51494670     | 2.03195024      | 0.220248550     | 190 |
| 0.763563037    | 2.21302438      | 4.14355546E-02  | 192 |
| 8.54379609E-02 | 2.78674173      | 1.33498776      | 194 |
| 8.49811733E-02 | 1.93555069      | -1.81657791     | 195 |
| -2.45220518    | 3.87256074      | 0.607450128     | 200 |
| 5.76848745     | 2.65119839      | -0.902300775    | 202 |
| 0.548269510    | 3.66776490      | -0.225037158    | 203 |
| 1.47963345     | 5.29088497      | 1.45576549      | 211 |
| 2.27981234     | 5.57309914      | -1.47959399     | 218 |
| 3.04202628     | 5.55247927      | -1.28420651     | 219 |
| 4.18926764     | 5.49491882      | -1.14680970     | 220 |
| 0.623432934    | 7.17509699      | 1.14199114      | 226 |
| 3.11847019     | 6.94261408      | 0.295778990     | 228 |
| 2.17089176     | 7.81910086      | -8.93315151E-02 | 235 |
| 4.93686628     | -2.22471404     | 1.03961027      | 242 |
| -1.27835548    | 9.41404477E-02  | -0.638587892    | 245 |
| 2.72798920     | 5.00163460      | 0.222463936     | 252 |
| 0.523386538    | 6.74674797      | -0.403200507    | 254 |
| 4.38898802     | -0.455112487    | 0.794640541     | 257 |

## Cluster Compound III-2

|    |              |              |                 |
|----|--------------|--------------|-----------------|
| Br | -1.90713441  | -1.23367798  | 2.66686510E-02  |
| O  | 0.588055372  | -2.74199367  | 0.155557394     |
| C  | 2.90393710   | 0.295360744  | 4.01597004E-03  |
| N  | -0.170829505 | 2.94403601   | 3.12834121E-02  |
| C  | -3.68392706  | -0.760655522 | -8.34828708E-03 |
| C  | -4.67201328  | -1.62949097  | -7.51371915E-03 |
| H  | -4.49999285  | -2.66876388  | 6.63131522E-03  |
| N  | -5.94700098  | -1.24774897  | -1.77161396E-02 |
| H  | -6.66985130  | -1.91117918  | -8.55355244E-03 |

|    |                 |                |                 |
|----|-----------------|----------------|-----------------|
| C  | -6.34119272     | 4.49307859E-02 | -1.87130459E-02 |
| O  | -7.44666100     | 0.392782599    | -1.41857080E-02 |
| N  | -5.29583693     | 0.928487718    | -3.10671069E-02 |
| H  | -5.57887554     | 1.87098265     | -3.81438956E-02 |
| C  | -4.00392246     | 0.625194609    | -3.77870537E-02 |
| N  | -3.13541508     | 1.55050898     | -6.83505684E-02 |
| H  | -2.14575911     | 1.40378439     | -9.94937271E-02 |
| H  | -3.37940359     | 2.50321746     | -7.39388093E-02 |
| O  | -0.350654095    | 1.75185537     | -0.229227155    |
| O  | 0.948681951     | 3.32701683     | 0.193538010     |
| O  | -1.09296978     | 3.67395401     | 0.130185887     |
| N  | 1.70702553      | -0.131878093   | 7.41789863E-03  |
| H  | 1.49496603      | -1.09486914    | 3.95813733E-02  |
| H  | 0.951864064     | 0.516987026    | -2.88495421E-02 |
| N  | 3.12283635      | 1.60014939     | -5.22662362E-04 |
| H  | 2.33925700      | 2.22714877     | 2.34581511E-02  |
| C  | 4.33678293      | 2.21766043     | -2.82834582E-02 |
| O  | 4.46931744      | 3.36894250     | -5.30146770E-02 |
| N  | 5.38293409      | 1.35156846     | -2.31438987E-02 |
| H  | 6.27394152      | 1.76182675     | -3.70899066E-02 |
| C  | 5.23809671      | 3.64262611E-02 | -1.82412416E-02 |
| H  | 6.12588501      | -0.530881226   | -2.85949185E-02 |
| C  | 4.05035067      | -0.538274467   | -6.80164155E-03 |
| Br | 3.92039371      | -2.38092780    | -2.18129698E-02 |
| H  | -8.86095241E-02 | -3.05969501    | -0.398321450    |
| H  | 1.17167711      | -3.40059161    | 0.455264419     |

## Coordinates and Index of Bond-Critical Points

|              |              |                 |    |
|--------------|--------------|-----------------|----|
| 2.09506702   | -2.54991913  | 2.04826966E-02  | 40 |
| -0.638267100 | -2.13934636  | 0.107655957     | 41 |
| 1.15560067   | -1.66774869  | 6.62660077E-02  | 45 |
| -2.83790660  | -0.984946370 | 6.02004817E-03  | 46 |
| 3.98389482   | -1.40293515  | -1.33443251E-02 | 48 |
| 0.530360520  | 0.967909455  | -9.61711109E-02 | 63 |
| -1.53908622  | 1.54819226   | -0.146144077    | 68 |
| 1.84364808   | 2.56936240   | 7.89199024E-02  | 76 |

## Cluster Compound III-3

|   |             |                 |              |
|---|-------------|-----------------|--------------|
| C | -5.76121187 | 0.321752846     | -1.01917779  |
| N | -4.48369217 | -4.73947488E-02 | -0.957294643 |
| C | -4.09052753 | -1.33645868     | -0.964579284 |
| N | -5.10266447 | -2.22149706     | -1.01523304  |

---

|    |                 |                 |              |
|----|-----------------|-----------------|--------------|
| C  | -6.40603304     | -1.93299687     | -1.03136671  |
| C  | -6.73012447     | -0.578878820    | -1.06777740  |
| O  | -2.94693398     | -1.66995513     | -0.908774853 |
| N  | -7.25502062     | -2.89472270     | -1.02021039  |
| Br | -8.48802853     | -5.78886271E-02 | -1.23482072  |
| O  | -1.59103763     | -4.15300512     | -0.860610843 |
| N  | 1.26638114      | -4.19584703     | -0.690777838 |
| C  | 2.11536860      | -3.23412108     | -0.701934040 |
| N  | 3.41873741      | -3.52262163     | -0.685800493 |
| C  | 4.43087482      | -2.63758302     | -0.635146618 |
| N  | 4.03770971      | -1.34851897     | -0.627862096 |
| C  | 2.76019073      | -0.979371488    | -0.689745307 |
| C  | 1.79127741      | -1.88000298     | -0.738344908 |
| O  | 5.57446766      | -2.97107935     | -0.579342306 |
| Br | 3.33744213E-02  | -1.35901201     | -0.905388474 |
| O  | 4.23517895      | -6.18294382     | -0.571542263 |
| N  | 3.43922210      | -7.08968496     | -0.472198904 |
| O  | 3.79105091      | -8.21505356     | -0.224229515 |
| O  | 2.24917436      | -6.83179951     | -0.621697545 |
| O  | 6.93036461      | -5.45412970     | -0.531179249 |
| O  | 4.52724171      | 1.46722662      | -0.544711411 |
| N  | 5.72331858      | 1.71860230      | -0.583843291 |
| O  | 6.52851057      | 0.811126232     | -0.572572827 |
| O  | 6.10655546      | 2.87879157      | -0.634928465 |
| N  | 2.69241476      | 3.46599746      | -0.670368135 |
| C  | 1.45454943      | 2.92476153      | -0.663369834 |
| N  | 0.462361693     | 3.81224847      | -0.807962835 |
| C  | 0.670613110     | 5.12775469      | -0.910631955 |
| C  | 1.89330983      | 5.62662792      | -0.884970725 |
| C  | 2.98438191      | 4.74627972      | -0.770493686 |
| O  | 1.27766991      | 1.75255299      | -0.558693230 |
| N  | 4.20762396      | 5.11757660      | -0.762217343 |
| Br | 2.16195536      | 7.44160366      | -0.970693648 |
| C  | 0.651123822     | 1.91505826      | 2.34473634   |
| N  | 1.64059901      | 1.01912308      | 2.49087143   |
| C  | 1.44786704      | -0.291651279    | 2.56084585   |
| C  | 0.238195673     | -0.808441997    | 2.48053217   |
| C  | -0.850747705    | 5.21539785E-02  | 2.33397412   |
| N  | -0.581399024    | 1.35482621      | 2.26680875   |
| O  | 0.819773853     | 3.08299065      | 2.27626920   |
| N  | -2.06975317     | -0.319225639    | 2.25985122   |
| Br | -3.36221941E-02 | -2.62053847     | 2.56336570   |

|   |                 |                 |              |
|---|-----------------|-----------------|--------------|
| O | -2.42191577     | 3.32938218      | 2.17676973   |
| N | -3.60384321     | 3.06885743      | 2.18286610   |
| O | -4.40594530     | 3.97631717      | 2.16154408   |
| O | -3.97567582     | 1.90488029      | 2.21163964   |
| H | 1.57369423      | -5.11398745     | -0.596029639 |
| H | 0.303998560     | -4.06216526     | -0.739244878 |
| H | 4.70302105      | -0.654868245    | -0.477494061 |
| H | 3.64229679      | -4.46930647     | -0.671313941 |
| H | 2.53503942      | -3.29937898E-02 | -0.698480546 |
| H | 6.49350357      | -4.58708906     | -0.469594777 |
| H | 6.12477016      | -5.99843121     | -0.565156698 |
| H | -2.36132121     | -1.24260211     | 2.35345936   |
| H | -2.80027866     | 0.311465144     | 2.13753009   |
| H | 2.54948330      | 1.36464417      | 2.52163982   |
| H | -1.28281951     | 2.02892351      | 2.26533937   |
| H | 2.21346569      | -0.880843639    | 2.67535067   |
| H | 4.45428228      | 6.04954767      | -0.892560840 |
| H | 4.92910099      | 4.46697760      | -0.711291790 |
| H | -0.452275068    | 3.48090792      | -0.815227091 |
| H | 3.43171883      | 2.84185243      | -0.569016874 |
| H | -8.94358382E-02 | 5.72744799      | -1.00598955  |
| H | -6.94770718     | -3.81286359     | -0.925463140 |
| H | -8.21740341     | -2.76104140     | -1.06867838  |
| H | -3.81838179     | 0.646256089     | -0.806926668 |
| H | -4.87910509     | -3.16818142     | -1.00074685  |
| H | -5.98636341     | 1.26813066      | -1.02791321  |
| H | -2.02789855     | -3.28596354     | -0.799026787 |
| H | -2.39663196     | -4.69730663     | -0.894588351 |

## Coordinates and Index of Bond-Critical Points

|                 |              |              |     |
|-----------------|--------------|--------------|-----|
| 1.85094094      | -5.68968391  | -0.612151325 | 78  |
| 5.43819571      | -6.06300735  | -0.557226598 | 79  |
| 3.81728721      | -5.06309271  | -0.635880709 | 84  |
| -0.380480111    | -4.11763191  | -0.780976117 | 87  |
| 0.716580212     | -3.36807394  | 0.817997217  | 91  |
| 6.12393093      | -4.03249979  | -0.519930840 | 95  |
| -2.39779687     | -2.73837113  | -0.848846495 | 100 |
| -0.974146187    | -2.82017803  | -0.865637302 | 102 |
| 0.106771834     | -1.66858554  | 2.51909781   | 104 |
| -4.56819460E-02 | -1.94425333  | 0.857236028  | 106 |
| -1.57221961     | -1.56994784  | -0.883469343 | 114 |
| -2.48353314     | -0.976784289 | 0.615017354  | 116 |

|             |              |              |     |
|-------------|--------------|--------------|-----|
| 0.975783885 | -1.63907051  | -0.813668132 | 119 |
| 0.122705847 | -1.05104434  | 0.912467122  | 120 |
| -7.57685232 | -0.330561250 | -1.14674067  | 126 |
| -3.16974163 | 0.918113053  | 2.17138505   | 137 |
| 0.679292500 | 0.372519106  | -0.720070601 | 144 |
| 4.56158400  | 0.137828469  | -0.520088792 | 145 |
| 3.55663729  | 0.377379775  | -0.626103401 | 148 |
| 2.05879235  | 0.675202191  | -0.637535393 | 151 |
| -1.68602383 | 2.44409490   | 2.23062134   | 153 |
| 0.999631763 | 1.94857645   | 0.917857289  | 156 |
| 3.81346822  | 2.38832593   | -0.566586256 | 162 |
| 5.29430866  | 3.86363673   | -0.682973385 | 170 |
| 2.02397418  | 6.49003839   | -0.926644564 | 180 |
| -1.04408562 | 3.44271636   | 0.671267152  | 187 |
| 2.02397418  | 6.49003839   | -0.926644564 | 180 |
| -1.04408562 | 3.44271636   | 0.671267152  | 187 |

## Cluster Compound IV-1

|    |             |              |                 |
|----|-------------|--------------|-----------------|
| Br | 6.62897205  | -2.88695860  | -0.611891031    |
| C  | 5.24460936  | -1.64479578  | -0.608255208    |
| C  | 5.50853634  | -0.314033806 | -0.324669093    |
| N  | 6.69311619  | 0.146970153  | -8.50696564E-02 |
| H  | 7.42610550  | -0.520053864 | -9.57088917E-02 |
| H  | 6.78290606  | 1.08513987   | 0.284045994     |
| N  | 4.49082899  | 0.497690469  | -0.283801347    |
| H  | 4.64415455  | 1.47487855   | -0.113854647    |
| C  | 3.18795538  | 0.150638431  | -0.473660618    |
| O  | 2.32425928  | 0.935436904  | -0.406934232    |
| N  | 2.99923992  | -1.15973639  | -0.715444505    |
| H  | 2.05065513  | -1.49633300  | -0.711383164    |
| C  | 3.96928596  | -2.02493691  | -0.778783619    |
| H  | 3.74096751  | -3.05592442  | -0.970015705    |
| S  | 5.64581490  | 3.81989551   | 1.32795560      |
| O  | 6.46163082  | 2.64507914   | 1.61009228      |
| O  | 6.47010708  | 4.91706419   | 0.905548453     |
| O  | 4.91643620  | 4.22034216   | 2.50284743      |
| O  | 4.67492676  | 3.44023991   | 0.253077537     |
| O  | 2.28045344  | 4.22674561   | 0.593769848     |
| H  | 3.22801638  | 3.85529280   | 0.391410172     |
| H  | 1.80289555  | 4.18007088   | -0.235384822    |
| H  | 1.84958661  | 3.71974707   | 1.27288544      |
| S  | 0.568317056 | -3.95458055  | -0.436469972    |

|    |              |                 |                 |
|----|--------------|-----------------|-----------------|
| O  | 1.11996710   | -4.81253672     | 0.592118979     |
| O  | 1.46040201   | -3.97398114     | -1.61279762     |
| O  | 0.456275403  | -2.55905843     | 4.74849455E-02  |
| O  | -0.722548127 | -4.47433853     | -0.777911007    |
| N  | -2.35699844  | -1.97640347     | -1.93839148E-02 |
| H  | -1.36671352  | -1.80679083     | 2.21981248E-03  |
| H  | -2.79711509  | -2.84684825     | 0.283486873     |
| C  | -3.09110951  | -0.951885641    | -0.198564649    |
| C  | -2.57349563  | 0.377013296     | -0.389133394    |
| Br | -0.742622793 | 0.676363230     | -0.333822548    |
| C  | -3.44289398  | 1.37691939      | -0.503814459    |
| H  | -3.08022761  | 2.37146020      | -0.616252065    |
| N  | -4.75259256  | 1.16259491      | -0.481217235    |
| H  | -5.37286186  | 1.95682693      | -0.433811903    |
| C  | -5.30679941  | -6.59412071E-02 | -0.335275888    |
| O  | -6.45364952  | -0.265128821    | -0.306377888    |
| N  | -4.40920305  | -1.05976570     | -0.198783770    |
| H  | -4.81377935  | -1.98705053     | -0.100083686    |
| S  | -5.25942469  | -4.59763241     | 1.15192032      |
| O  | -3.93893385  | -4.06590557     | 1.50119209      |
| O  | -5.83969831  | -3.69873571     | 0.133364305     |
| O  | -6.12617254  | -4.61645937     | 2.32120228      |
| O  | -5.14543486  | -5.94835234     | 0.640441179     |
| S  | -5.30690193  | 4.79990625      | 4.41380180E-02  |
| O  | -4.50744724  | 4.41347265      | -1.16530216     |
| O  | -4.40764952  | 5.14962769      | 1.11223364      |
| O  | -6.11508083  | 5.96367884      | -0.235364184    |
| O  | -6.13560057  | 3.68793154      | 0.419059187     |
| H  | -3.70310950  | 5.80383682      | -3.48597980     |
| H  | -3.86292100  | 5.20725107      | -2.04024577     |
| H  | -2.41536450  | 5.49926424      | -2.90155196     |
| O  | -3.28819013  | 5.83379650      | -2.71170259     |

## Coordinates and Index of Bond-Critical Points

|              |             |                 |    |
|--------------|-------------|-----------------|----|
| -3.23848081  | -3.27199388 | 0.710739374     | 63 |
| -1.54415762  | -3.15715384 | -0.416905671    | 67 |
| -5.16601801  | -2.59836698 | -3.82875255E-03 | 68 |
| 2.82079577   | -3.34243965 | -1.19077456     | 71 |
| -0.718380630 | -2.11046791 | 9.84741841E-03  | 73 |
| 1.49400258   | -1.89014626 | -0.435766101    | 77 |
| 5.87873411   | -2.20885205 | -0.610423386    | 78 |
| 7.03746271   | -1.33804142 | -0.287295878    | 86 |



|              |             |                |     |
|--------------|-------------|----------------|-----|
| -1.72955406  | 0.514786422 | -0.364541620   | 94  |
| 0.872334540  | 0.759454072 | -0.399822086   | 101 |
| -5.62505579  | 2.59992385  | -0.113833033   | 107 |
| 6.63798952   | 1.66029263  | 0.754767179    | 109 |
| 4.66335154   | 2.17701888  | 2.94313729E-02 | 111 |
| 2.38672304   | 2.58964634  | 9.08633545E-02 | 112 |
| -3.70684195  | 3.15350628  | -0.824309587   | 114 |
| 3.67791891   | 3.73484850  | 0.363328159    | 119 |
| -4.05074453  | 4.99369335  | -1.78358412    | 128 |
| -0.316271394 | 4.79772425  | -1.53419995    | 133 |

## Cluster Compound IV-2

|    |              |                 |                |
|----|--------------|-----------------|----------------|
| S  | -2.70754790  | -0.565019131    | -0.768166423   |
| O  | -3.20100403  | 2.80917811      | -0.336224437   |
| O  | -3.17698908  | 4.44951765E-02  | 2.71794605     |
| O  | -2.28851962  | -3.47811031     | 1.03979254     |
| N  | 0.567170560  | 0.951425612     | -0.309700072   |
| C  | 1.46596885   | -1.15760369E-02 | -0.382562786   |
| C  | 2.76552129   | 0.308029652     | 6.40608519E-02 |
| C  | 2.98391294   | 1.54624140      | 0.473495156    |
| N  | 2.02229881   | 2.47102070      | 0.498785108    |
| C  | 0.758686304  | 2.21915054      | 0.123951152    |
| N  | 1.13511872   | -1.14924884     | -0.861215532   |
| Br | 4.10201120   | -0.959945738    | 3.72058526E-02 |
| H  | 0.187633857  | -1.36509836     | -1.03699803    |
| H  | 1.79706395   | -1.87342334     | -0.883583367   |
| H  | -0.350783259 | 0.784319222     | -0.664342940   |
| O  | -0.123892896 | 2.99023128      | 0.171477407    |
| H  | 2.21918273   | 3.38418531      | 0.806393385    |
| H  | 3.93445921   | 1.86101162      | 0.803047001    |
| O  | -2.05426621  | 0.660350800     | -1.19884789    |
| O  | -1.66136730  | -1.46766579     | -0.277498960   |
| O  | -3.40228939  | -1.14889586     | -1.81923652    |
| O  | -3.68851638  | -0.241919905    | 0.336714447    |
| H  | -1.99183977  | -2.75631332     | 0.583407521    |
| H  | -2.19884920  | -3.35790467     | 1.97286081     |
| H  | -1.76233447  | -4.20772409     | 0.734224379    |
| H  | -3.40525937  | -0.150379390    | 1.24452305     |
| H  | -3.47375178  | -0.663435578    | 3.19550610     |
| H  | -3.65336347  | 0.783091486     | 3.04014874     |
| H  | -3.10562444  | 2.92387176      | 0.595760047    |
| H  | -2.85921359  | 3.55575299      | -0.815948844   |

|   |             |            |              |
|---|-------------|------------|--------------|
| H | -2.72883892 | 2.09569049 | -0.628274202 |
|---|-------------|------------|--------------|

## Coordinates and Index of Bond-Critical Points

|              |                 |                 |    |
|--------------|-----------------|-----------------|----|
| -1.91203237  | -2.34265900     | 0.310444355     | 35 |
| -0.481268823 | -1.36396098     | -0.723370731    | 38 |
| -3.34780049  | -9.02065486E-02 | 1.69837987      | 41 |
| 3.40535212   | -0.301746458    | 5.02056852E-02  | 49 |
| -0.938665509 | 0.730343163     | -0.829143047    | 52 |
| -2.52798772  | 1.61696804      | -0.799399793    | 56 |
| -1.68171275  | 2.84162664      | -9.64519829E-02 | 65 |

## Cluster Compound IV-3

|   |                |                |                 |
|---|----------------|----------------|-----------------|
| S | -2.74935985    | -2.14235020    | -1.96039467E-03 |
| O | -3.23815918    | 1.39052236     | -6.28701746E-02 |
| S | -0.207088202   | 3.03434134     | 2.05092877E-02  |
| O | 0.286029130    | -0.496189773   | 8.15378428E-02  |
| S | 3.66931200     | -1.10413158    | -3.07103246E-02 |
| O | -3.89374399    | -2.53859353    | 0.794799209     |
| O | -2.37142348    | -3.13163018    | -0.967991889    |
| O | -1.66330397    | -1.86652231    | 0.925419807     |
| O | -3.09070206    | -0.884119511   | -0.725389957    |
| H | -4.08852625    | 1.70224488     | -0.417983264    |
| H | -3.15789247    | 0.434004337    | -0.221080676    |
| H | -2.49874234    | 1.88536441     | -0.456309289    |
| O | -1.33301461    | 2.73667789     | -0.930820286    |
| O | -0.648327947   | 4.06056643     | 0.943693399     |
| O | 4.55788411E-02 | 1.82013798     | 0.776566863     |
| O | 0.936122179    | 3.44198298     | -0.732129931    |
| H | -0.437071800   | -1.00846016    | 0.473945588     |
| H | 0.237742171    | 0.452276647    | 0.338688523     |
| H | 1.17216265     | -0.848958790   | 0.401440054     |
| O | 2.49860263     | -1.50949156    | 0.784445941     |
| O | 4.04237652     | -2.16565490    | -0.957440734    |
| O | 4.78150702     | -0.829158306   | 0.870705545     |
| O | 3.31927204     | 6.86947852E-02 | -0.791040301    |

## Coordinates and Index of Bond-Critical Points

|              |                |              |    |
|--------------|----------------|--------------|----|
| -0.832950890 | -1.27712965    | 0.593266904  | 28 |
| 1.58341277   | -1.04712343    | 0.506185114  | 30 |
| -3.13747907  | 4.30503562E-02 | -0.358323634 | 35 |
| 0.172791347  | 0.869160950    | 0.455531329  | 40 |

|             |            |              |    |
|-------------|------------|--------------|----|
| -2.13898706 | 2.14656091 | -0.581980884 | 43 |
| 2.03117681  | 1.67171800 | -0.642620444 | 44 |

## Cluster Compound V-1

|    |              |                 |                 |
|----|--------------|-----------------|-----------------|
| N  | 3.77835560   | -2.39193230E-03 | -1.24532783     |
| H  | 3.79746437   | -1.00666797     | -1.35495007     |
| C  | 4.88628054   | 0.676832795     | -1.05143166     |
| H  | 5.80786276   | 0.167136118     | -1.03933227     |
| C  | 4.86978006   | 1.99978268      | -0.870171726    |
| Br | 6.43465996   | 2.97688818      | -0.658746064    |
| C  | 3.63856673   | 2.64164567      | -0.797250628    |
| N  | 3.50318694   | 3.89570045      | -0.525185227    |
| H  | 4.29406023   | 4.45405531      | -0.382708699    |
| H  | 2.58724713   | 4.29811144      | -0.459590852    |
| N  | 2.57271433   | 1.91557479      | -0.983205795    |
| H  | 1.66468978   | 2.31107783      | -0.949699163    |
| C  | 2.56418610   | 0.576526046     | -1.27130032     |
| O  | 1.58173871   | -9.87687963E-04 | -1.51753676     |
| P  | 4.62537766   | -1.37382019     | 2.13728237      |
| O  | 5.03371334   | -1.62241781     | 3.59735012      |
| H  | 4.64807463   | -1.00758088     | 4.18468761      |
| O  | 3.87866330   | -0.123736389    | 1.99789619      |
| O  | 5.97934628   | -1.22876239     | 1.34641981      |
| H  | 6.54608917   | -1.96572399     | 1.44511199      |
| O  | 3.90806723   | -2.54338026     | 1.64540124      |
| P  | 4.30863762   | -3.98217583     | -1.51885736     |
| O  | 4.71696949   | -4.23077726     | -5.87884113E-02 |
| H  | 4.35592842   | -3.60017443     | 0.542044759     |
| O  | 3.55598521   | -5.13074064     | -1.99600637     |
| O  | 5.67870045   | -3.88321137     | -2.32739186     |
| H  | 6.22161007   | -4.63326025     | -2.22567010     |
| O  | 3.59309316   | -2.70084333     | -1.66631985     |
| N  | 1.29986727   | -2.36289263     | 1.08975935      |
| H  | 2.18771124   | -2.38141179     | 1.24151802      |
| C  | 0.771950185  | -3.58204317     | 0.763902366     |
| O  | 1.43918645   | -4.51618910     | 0.636089981     |
| N  | -0.584028780 | -3.59838510     | 0.607039750     |
| H  | -0.994395435 | -4.47791815     | 0.470319629     |
| C  | -1.33083379  | -2.49704099     | 0.671247542     |
| H  | -2.38787651  | -2.57432413     | 0.542539060     |
| C  | -0.793274879 | -1.31331706     | 0.889400482     |
| Br | -1.81614077  | 0.232655898     | 0.917505443     |

|    |                 |              |                 |
|----|-----------------|--------------|-----------------|
| C  | 0.615466952     | -1.24164295  | 1.15285587      |
| N  | 1.21764529      | -0.166564494 | 1.47341347      |
| H  | 2.19940782      | -0.183018133 | 1.67327130      |
| H  | 0.720282078     | 0.678751945  | 1.52501285      |
| C  | -5.63083601     | -0.850326061 | -0.145074591    |
| H  | -4.68717909     | -0.781332672 | -3.01724430E-02 |
| C  | -6.18374825     | -2.06783772  | -0.369465411    |
| Br | -5.16183043     | -3.61239648  | -0.397560567    |
| C  | -7.54861736     | -2.13685846  | -0.626190603    |
| N  | -8.16225910     | -3.23238707  | -0.952879071    |
| H  | -7.66536093     | -4.07691526  | -1.00445676     |
| H  | -9.12308121     | -3.21627545  | -1.14848483     |
| N  | -8.23404026     | -1.01394141  | -0.562979162    |
| H  | -9.20375443     | -0.993707538 | -0.728726983    |
| C  | -7.70602131     | 0.205452085  | -0.237023816    |
| O  | -8.37423515     | 1.14095783   | -0.109008111    |
| N  | -6.36774969     | 0.221580431  | -8.21982622E-02 |
| H  | -5.94920731     | 1.11864352   | 5.72703257E-02  |
| P  | -4.26596308     | 3.60992718   | 0.376650721     |
| O  | -3.23888254     | 2.94868398   | 1.31758475      |
| H  | -2.40392041     | 3.37936020   | 1.31787252      |
| O  | -3.57415247     | 3.62173676   | -1.05866599     |
| H  | -4.09868813     | 3.20813704   | -1.71003437     |
| O  | -4.48424244     | 4.97268915   | 0.797973990     |
| O  | -5.49327278     | 2.78250694   | 0.377259970     |
| P  | -0.225585684    | 4.29166794   | -0.355489075    |
| O  | -0.892104626    | 4.28148603   | 1.02870393      |
| H  | -0.366518438    | 4.69628572   | 1.68051052      |
| O  | -1.26336646     | 4.95874214   | -1.30608451     |
| H  | -2.09718680     | 4.52865601   | -1.30568063     |
| O  | 0.988129079     | 5.10992098   | -0.357263774    |
| O  | -3.03636328E-03 | 2.90342784   | -0.780420661    |

## Coordinates and Index of Bond-Critical Points

|             |             |              |    |
|-------------|-------------|--------------|----|
| -6.78471899 | -3.71345091 | -0.753341734 | 73 |
| 2.61142063  | -4.57105207 | -0.544258893 | 75 |
| 3.03587961  | -4.32102203 | 0.206599355  | 76 |
| -3.41247439 | -2.95688748 | 0.187678829  | 82 |
| -5.70703506 | -2.79177976 | -0.384347349 | 83 |
| 4.46753263  | -4.06277561 | -0.939254045 | 85 |
| 4.22270823  | -3.23723340 | 0.910540938  | 90 |
| 4.85387325  | -3.96337771 | -1.82282615  | 92 |
| 2.79491019  | -2.42002511 | 1.39468253   | 97 |

|              |                 |                 |     |
|--------------|-----------------|-----------------|-----|
| 2.46520829   | -2.55785465     | -0.262116790    | 99  |
| 4.77969551   | -1.45478177     | 2.71817541      | 107 |
| 5.16576147   | -1.33937430     | 1.83990514      | 112 |
| -1.27897954  | -0.577981353    | 0.904012978     | 118 |
| -3.65299916  | -0.438007057    | 0.316388488     | 119 |
| 3.74691200   | -1.59390879     | -1.45483887     | 121 |
| 2.77648211   | -0.180632651    | 1.78486085      | 125 |
| 1.43234432   | -9.27975029E-02 | -4.93629500E-02 | 127 |
| 5.68646526   | -0.362014949    | 3.33725475E-02  | 132 |
| 3.91139269   | -4.74058352E-02 | 0.385143965     | 134 |
| -5.76988983  | 1.68586183      | 0.161628157     | 135 |
| -2.56212592  | 1.62184823      | 1.12190485      | 136 |
| -0.833455086 | 1.67071319      | 4.10988107E-02  | 141 |
| -3.84300780  | 3.35766459      | 0.733856380     | 148 |
| 1.09040058   | 2.53468180      | -0.881204724    | 150 |
| -1.87282050  | 3.70022392      | 1.21021378      | 153 |
| -4.00788498  | 3.59943390      | -0.192111105    | 154 |
| 5.58618736   | 2.44980955      | -0.771681786    | 156 |
| -0.477550060 | 4.29741287      | 0.196988583     | 163 |
| -2.61185265  | 4.20546722      | -1.21595550     | 164 |
| 4.98098326   | 3.75318480      | -0.522614121    | 166 |
| -0.653515697 | 4.53903055      | -0.716800451    | 167 |
| 2.01991343   | 4.56472635      | -0.423574537    | 172 |

## Cluster Compound V-2

|    |                |              |                 |
|----|----------------|--------------|-----------------|
| N  | 1.86166561     | -0.432216257 | -2.94257067E-02 |
| O  | -0.643727541   | -1.61082757  | 8.39059576E-02  |
| C  | -1.74818695    | -1.23926687  | 4.79810014E-02  |
| P  | 0.455890447    | 2.93280745   | 0.135171384     |
| C  | 3.11316299     | -0.194323957 | -6.55928403E-02 |
| C  | 4.08001184     | -1.23408377  | -3.90636772E-02 |
| Br | 3.55606771     | -3.00363469  | 5.09477854E-02  |
| C  | 5.35332680     | -0.903336346 | -8.42820629E-02 |
| H  | 6.11884117     | -1.62712657  | -6.98782578E-02 |
| N  | 5.73833847     | 0.362716019  | -0.150145218    |
| H  | 6.68926573     | 0.600310385  | -0.185487539    |
| C  | 4.87273645     | 1.41084218   | -0.170840204    |
| O  | 5.23243523     | 2.51308250   | -0.222177193    |
| N  | 3.56117821     | 1.04573166   | -0.125767365    |
| H  | 2.91473150     | 1.83388901   | -0.121174335    |
| O  | 3.20394598E-02 | 1.53091836   | -4.16470841E-02 |
| O  | 1.88943923     | 3.13748813   | -3.10865659E-02 |

|    |                |                |                 |
|----|----------------|----------------|-----------------|
| O  | 2.69078966E-02 | 3.48664927     | 1.53651929      |
| H  | 0.711449862    | 3.99846625     | 1.91276526      |
| O  | -0.313179255   | 3.81235838     | -0.909801900    |
| H  | 0.218020901    | 4.51643944     | -1.21660054     |
| N  | -2.10111380    | 5.06567284E-02 | -7.53398761E-02 |
| H  | -1.32482541    | 0.722285748    | -8.91114250E-02 |
| C  | -3.34783053    | 0.446318865    | -0.120363101    |
| H  | -3.49774647    | 1.48632276     | -0.212582991    |
| C  | -4.37755871    | -0.403531224   | -5.52928597E-02 |
| Br | -6.12647343    | 0.179997429    | -0.126930848    |
| C  | -4.08467579    | -1.75615025    | 7.40215108E-02  |
| N  | -4.98515224    | -2.67595744    | 0.150851488     |
| H  | -5.93492746    | -2.43323159    | 0.119156294     |
| H  | -4.76263380    | -3.62548876    | 0.244677797     |
| N  | -2.80735230    | -2.10233498    | 0.119413435     |
| H  | -2.54943824    | -3.04709482    | 0.207825676     |
| H  | 1.18514645     | 0.304600269    | -4.52941507E-02 |
| H  | 1.52778161     | -1.35050952    | 1.53266350E-02  |

## Coordinates and Index of Bond-Critical Points

|              |              |                 |    |
|--------------|--------------|-----------------|----|
| 3.83038163   | -2.06386185  | 3.22656403E-03  | 42 |
| 2.43866396   | -1.78348088  | 1.83530319E-02  | 45 |
| 0.626572430  | -1.29264402  | 3.49101461E-02  | 47 |
| -5.20966482  | -0.128968120 | -8.90571401E-02 | 51 |
| 0.813763201  | 0.728225112  | -3.91076282E-02 | 65 |
| -0.894445896 | 0.991614580  | -6.87539130E-02 | 66 |
| 2.55924964   | 2.24841356   | -8.60324949E-02 | 74 |
| 0.299429357  | 3.15800095   | 0.685025752     | 75 |
| 0.165546760  | 3.28946018   | -0.272607893    | 77 |

## Cluster Compound VI-1

|    |              |              |              |
|----|--------------|--------------|--------------|
| C  | -2.60934186  | 1.22681642   | -0.250621945 |
| O  | -3.32733440  | 2.12690115   | -0.151454091 |
| N  | -1.27557206  | 1.36711740   | -0.428121328 |
| H  | -0.934231222 | 2.31056881   | -0.470262587 |
| C  | -0.467890352 | 0.356464922  | -0.538174033 |
| H  | 0.573208749  | 0.533850372  | -0.659080207 |
| C  | -0.917301834 | -0.904560864 | -0.502687335 |
| Br | 0.222410008  | -2.37322021  | -0.615239024 |
| C  | -2.31031418  | -1.12076521  | -0.331019044 |
| N  | -2.84027028  | -2.29469323  | -0.263399422 |
| H  | -3.85212731  | -2.33761191  | -0.197456226 |

|    |              |                 |                 |
|----|--------------|-----------------|-----------------|
| H  | -2.25909305  | -3.07452345     | -0.442317784    |
| N  | -3.05474329  | -5.74973933E-02 | -0.216880426    |
| H  | -4.04305696  | -0.155658051    | -8.58371407E-02 |
| O  | -5.74495411  | 3.24757004      | -1.02014601     |
| H  | -5.18382120  | 2.63640428      | -0.571233630    |
| H  | -5.85943556  | 2.76871419      | -1.82445908     |
| O  | -1.40043998  | -5.44214582     | -0.620842099    |
| H  | -1.60407495  | -5.89942408     | -1.42216003     |
| H  | -2.13986635  | -5.72541809     | -0.105155200    |
| C  | -6.28516960  | -1.32804036     | 0.431466222     |
| O  | -5.83236027  | -0.214632332    | 0.307814479     |
| O  | -5.69445992  | -2.36291814     | 0.215858385     |
| C  | -7.72287846  | -1.47511673     | 0.918367147     |
| O  | -8.33901882  | -0.344242036    | 1.03916717      |
| H  | -9.25457764  | -0.385416418    | 1.25614679      |
| O  | -8.16273212  | -2.52570367     | 1.15137494      |
| C  | 0.359423548  | 4.78130102      | -0.565071404    |
| O  | 0.477674544  | 5.96552277      | -0.670643210    |
| O  | -0.663293958 | 4.15884972      | -0.697889328    |
| C  | 1.61306775   | 3.94649243      | -0.216768399    |
| O  | 1.52222490   | 2.78807068      | -3.40101309E-03 |
| O  | 2.69291782   | 4.64317703      | -0.182342961    |
| H  | 3.49556637   | 4.16801357      | -5.73381037E-02 |
| O  | 1.88654888   | 7.40204000      | 1.27676594      |
| H  | 1.68212378   | 6.94292498      | 0.472240627     |
| H  | 1.14956760   | 7.11971331      | 1.79070961      |
| C  | 4.40018702   | -1.08892393     | 0.402625233     |
| Br | 3.26212835   | 0.377618760     | 0.515006840     |
| C  | 5.77750874   | -0.875152528    | 0.232891783     |
| N  | 6.30731440   | 0.298450142     | 0.165286899     |
| H  | 5.72439289   | 1.08061802      | 0.344738841     |
| H  | 7.29575968   | 0.340377241     | 0.100870751     |
| N  | 6.54759073   | -1.94259572     | 0.115720667     |
| H  | 7.52669430   | -1.84533417     | -1.40962582E-02 |
| C  | 6.10069609   | -3.23124409     | 0.149580091     |
| O  | 6.81806135   | -4.13054180     | 5.04869446E-02  |
| N  | 4.77338743   | -3.37087393     | 0.326204926     |
| H  | 4.43617058   | -4.30293798     | 0.367814600     |
| C  | 3.94832015   | -2.33847713     | 0.438638657     |
| H  | 2.90349865   | -2.51650429     | 0.559964418     |

|              |              |                 |     |
|--------------|--------------|-----------------|-----|
| -1.92269993  | -3.96442366  | -0.530094266    | 54  |
| -0.772761166 | -3.96224141  | -0.615668952    | 55  |
| -4.50190353  | -2.31930876  | -4.90295738E-02 | 60  |
| -1.39145494  | -2.63883209  | -0.470574468    | 63  |
| 1.94264400   | -2.40539455  | 0.133244470     | 71  |
| -0.397354007 | -1.57321525  | -0.553573310    | 78  |
| 1.78612745   | -1.02253067  | -3.08083035E-02 | 84  |
| -4.66558838  | -0.195495605 | 5.04095368E-02  | 85  |
| 3.85079288   | -0.378955752 | 0.458757937     | 91  |
| 1.56797910   | 0.404455900  | -0.215051740    | 95  |
| -5.47434855  | 1.44465017   | -0.246753171    | 99  |
| 4.87742424   | 0.687517405  | 0.379157722     | 103 |
| 0.855333924  | 1.51178575   | -0.365471005    | 106 |
| 2.41280770   | 1.65489566   | 0.199774697     | 107 |
| -4.47212362  | 2.44227052   | -0.431160718    | 109 |
| -0.815730453 | 2.95956898   | -0.548370183    | 113 |
| 1.24077582   | 6.56947899   | 6.96227178E-02  | 120 |

## Cluster Compounds VI-2

|    |              |              |                |
|----|--------------|--------------|----------------|
| C  | -1.13629246  | 1.11922741   | -0.467528224   |
| N  | -2.25841713  | 1.81310582   | -0.300508201   |
| C  | -3.45999146  | 1.23143768   | -0.131765664   |
| N  | -3.45261145  | -0.129282326 | -0.165890083   |
| C  | -2.36595583  | -0.877743959 | -0.340318531   |
| C  | -1.14038038  | -0.209242195 | -0.498421699   |
| O  | -4.46848822  | 1.85626400   | 1.97361149E-02 |
| N  | -2.47411299  | -2.15938520  | -0.334786683   |
| Br | 0.400320828  | -1.19450331  | -0.685630381   |
| O  | -5.83302212  | -1.12562954  | 0.323686540    |
| C  | -5.88866138  | -2.34873581  | 0.389342815    |
| C  | -7.18309355  | -2.98704791  | 0.857667029    |
| O  | -8.12539291  | -2.14345717  | 1.03573644     |
| O  | -4.97837877  | -3.12712812  | 0.115618236    |
| O  | -7.24823713  | -4.16083288  | 1.03357828     |
| O  | -2.63007951  | 4.44727898   | -0.427357554   |
| C  | -1.85504186  | 5.38548040   | -0.258449733   |
| C  | -0.416447341 | 5.00632334   | 3.98968123E-02 |
| O  | 0.365839839  | 6.01344585   | 0.110705562    |
| O  | -2.14634514  | 6.57568693   | -0.302528709   |
| O  | -0.111574873 | 3.86762404   | 0.192794695    |



|    |              |                 |                 |
|----|--------------|-----------------|-----------------|
| O  | -7.13586187  | 2.15033388      | -0.788999796    |
| O  | 2.79376435   | -2.81811023     | -0.279201329    |
| C  | 3.09863710   | -3.95681047     | -0.126302600    |
| C  | 4.53723097   | -4.33596659     | 0.172043085     |
| O  | 4.82853460   | -5.52617359     | 0.216122031     |
| O  | 5.31226921   | -3.39776540     | 0.340951771     |
| O  | 2.31634974   | -4.96393204     | -0.197112218    |
| O  | -0.201345146 | -4.54384184     | -0.823361754    |
| N  | 4.94060659   | -0.763592541    | 0.214102417     |
| C  | 6.14218092   | -0.181924507    | 4.53598760E-02  |
| N  | 6.13480043   | 1.17879546      | 7.94843584E-02  |
| C  | 5.04814434   | 1.92725706      | 0.253912807     |
| C  | 3.82256985   | 1.25875664      | 0.412015498     |
| C  | 3.81848192   | -6.97137266E-02 | 0.381121576     |
| O  | 7.15067768   | -0.806750894    | -0.106141903    |
| N  | 5.15630150   | 3.20889831      | 0.248380959     |
| Br | 2.28186870   | 2.24401641      | 0.599224627     |
| H  | 6.05615568   | 3.57354450      | 0.187589452     |
| H  | 4.36526585   | 3.73230505      | 0.464502364     |
| H  | 4.93321657   | -1.73636639     | 0.206617147     |
| H  | 7.00595474   | 1.59428191      | -4.24233377E-02 |
| H  | 2.97586727   | -0.545151532    | 0.482906014     |
| H  | 1.36843634   | -4.77105618     | -0.300355464    |
| H  | -0.813061535 | -5.09821796     | -0.308706701    |
| H  | -0.256945819 | -5.01592636     | -1.67215168     |
| H  | 1.31375325   | 5.82056952      | 0.213949665     |
| H  | -6.36573458  | 1.72247684      | -0.355954766    |
| H  | -7.09751797  | 1.68715847      | -1.64363301     |
| H  | -9.00044250  | -2.50919366     | 1.25235617      |
| H  | -3.37396741  | -2.52403069     | -0.273996919    |
| H  | -1.68307686  | -2.68279099     | -0.550907671    |
| H  | -2.25102711  | 2.78587961      | -0.293022960    |
| H  | -4.32376575  | -0.544768810    | -4.39823978E-02 |
| H  | -0.293678820 | 1.59466600      | -0.569312155    |

## Coordinates and Index of Bond-Critical Points

|                 |             |              |    |
|-----------------|-------------|--------------|----|
| 0.856048226     | -4.70703173 | -0.483059347 | 60 |
| -1.12837827     | -3.39058018 | -0.675579667 | 69 |
| -3.92577648     | -2.69937587 | -0.133231059 | 71 |
| -4.44180779E-02 | -2.98404336 | -0.759270012 | 74 |
| -1.01357913     | -1.99678171 | -0.560855925 | 79 |
| 1.61740863      | -2.09350681 | -0.421524733 | 81 |

---

|              |              |                 |     |
|--------------|--------------|-----------------|-----|
| 5.04240322   | -2.29004407  | 0.251496047     | 82  |
| -4.81276894  | -0.752060354 | 7.76172653E-02  | 84  |
| 3.04069710   | -1.48718083  | 0.144044712     | 85  |
| -0.416620195 | -0.672022402 | -0.588582039    | 90  |
| 2.01981878   | -0.705802560 | 5.30723818E-02  | 91  |
| 1.36026132   | 0.533955276  | -4.40946296E-02 | 100 |
| -5.65907860  | 1.77690053   | -0.254295439    | 108 |
| 0.679980338  | 1.76762927   | -0.134048998    | 112 |
| 3.08711576   | 1.73087180   | 0.503577769     | 113 |
| -0.343165338 | 2.54440141   | -0.229204997    | 118 |
| -2.35974956  | 3.34378576   | -0.338571936    | 120 |
| 1.07838368   | 3.15202785   | 0.338882983     | 121 |
| 3.69217658   | 3.08041883   | 0.479638845     | 123 |
